# Supplementary material for: Urinary MicroRNA Profiling Predicts the Development of Microalbuminuria in Patients with Type 1 Diabetes
Source: PubMed Central journal article supplement (PMC4519802; doi:10.3390/jcm4071498), 2015-07-17
Supplement: jcm-04-01498-s001.pdf [file jcm-04-01498-s001.pdf]

**Supplementary Table S1**

| <b>MiRBase_ID</b> | <b>Effect</b> | <b>Size</b> | <b>CI 95</b> | <b>POR</b> |
|-------------------|---------------|-------------|--------------|------------|
| hsa-miR-495       | FC            | 0.02        | 0–0.05       | 11,999:1   |
| hsa-miR-548o-3p   | FC            | 0.01        | 0–0.06       | 11,999:1   |
| hsa-let-7a-5p     | FC            | 0.09        | 0.02–0.3     | 5999:01:00 |
| hsa-miR-1247-5p   | FC            | 0.09        | 0.03–0.29    | 5999:01:00 |
| hsa-miR-767-3p    | OR            | 0           | 0–0.31       | 2999:01:00 |
| hsa-miR-122-5p    | FC            | 7.5         | 2.08–24.89   | 999:01:00  |
| hsa-miR-645       | OR            | 22.62       | 2.15–335.09  | 749:01:00  |
| hsa-miR-199a-5p   | OR            | 12.78       | 1.77–91.51   | 665.7:1    |
| hsa-let-7b-3p     | OR            | 9.15        | 1.87–60.27   | 332.3:1    |
| hsa-miR-30a-5p    | FC            | 0.19        | 0.06–0.65    | 314.8:1    |
| hsa-miR-17-5p     | FC            | 0.14        | 0.03–0.56    | 271.7:1    |
| hsa-miR-126-3p    | OR            | 8.24        | 1.43–44.49   | 221.2:1    |
| hsa-miR-548c-3p   | OR            | 0.05        | 0–0.61       | 221.2:1    |
| hsa-miR-665       | FC            | 0.16        | 0.04–0.62    | 213.3:1    |
| hsa-miR-640       | OR            | 8.19        | 1.44–45.81   | 213.3:1    |
| hsa-miR-302a-3p   | OR            | 7.65        | 1.65–45.67   | 186.5:1    |
| hsa-miR-616-5p    | OR            | 9.32        | 1.38–64.06   | 186.5:1    |
| hsa-miR-770-5p    | OR            | 17.55       | 1.68–285.11  | 180.8:1    |
| hsa-miR-424-5p    | FC            | 0.19        | 0.05–0.79    | 126.7:1    |
| hsa-miR-617       | OR            | 8.8         | 1.49–82.09   | 124:01:00  |
| hsa-miR-30e-5p    | FC            | 0.16        | 0.03–0.65    | 121.4:1    |
| hsa-miR-23a-3p    | FC            | 0.24        | 0.07–0.81    | 95.8:1     |
| hsa-miR-603       | FC            | 0.23        | 0.07–0.71    | 95.8:1     |
| hsa-let-7c        | FC            | 0.23        | 0.07–0.82    | 92.8:1     |
| hsa-miR-1908      | OR            | 0.07        | 0–1.02       | 84.7:1     |
| hsa-miR-124-3p    | FC            | 4.97        | 1.39–21.07   | 84.7:1     |
| hsa-miR-411-5p    | OR            | 5.94        | 1.27–35.25   | 83.5:1     |
| hsa-miR-92b-5p    | OR            | 5.8         | 1.19–31.27   | 72.2:1     |
| hsa-miR-126-5p    | OR            | 5.82        | 1.27–35.57   | 71.3:1     |
| hsa-miR-221-5p    | OR            | 5.8         | 1–32.2       | 57.8:1     |
| hsa-miR-142-5p    | OR            | 6.24        | 1.05–37.9    | 56.7:1     |
| hsa-miR-30b-5p    | FC            | 0.25        | 0.07–0.93    | 49.8:1     |
| hsa-miR-329       | FC            | 0.28        | 0.08–0.9     | 49.4:1     |
| hsa-miR-577       | FC            | 0.29        | 0.09–0.94    | 49.4:1     |
| hsa-miR-381       | OR            | 5.44        | 0.98–30.06   | 49.4:1     |
| hsa-miR-302c-5p   | OR            | 6.99        | 0.89–51.8    | 45.9:1     |
| hsa-miR-483-3p    | OR            | 5.44        | 1.02–31.7    | 45.5:1     |
| hsa-miR-548b-3p   | OR            | 0.12        | 0.01–1.18    | 44.1:1     |
| hsa-miR-885-3p    | FC            | 3.21        | 1.04–9.96    | 43.8:1     |
| hsa-miR-127-3p    | OR            | 0.02        | 0–2.13       | 43.4:1     |
| hsa-miR-567       | OR            | 0.02        | 0–1.61       | 41.9:1     |
| hsa-miR-122-3p    | OR            | 5.71        | 1.02–43.98   | 38.5:1     |
| hsa-miR-572       | FC            | 0.31        | 0.1–1.02     | 37.5:1     |
| hsa-miR-2110      | FC            | 0.33        | 0.1–1.01     | 34.9:1     |
| hsa-let-7b-5p     | FC            | 0.31        | 0.09–1.01    | 33.1:1     |
| hsa-miR-379-3p    | OR            | 7.82        | 0.77–125.09  | 27.6:1     |
| hsa-miR-302d-5p   | OR            | 4.34        | 0.87–22.87   | 26.1:1     |

CI 95, 95% confidence intervals; POR, posterior odds ratio; FC, fold change; OR, odd ratio.

|                  |    |      |             |        |
|------------------|----|------|-------------|--------|
| hsa-miR-210      | FC | 0.26 | 0.06–1.14   | 25.7:1 |
| hsa-miR-34a-3p   | OR | 0.03 | 0–2.06      | 25.7:1 |
| hsa-miR-373-3p   | OR | 6.67 | 0.72–102.06 | 24.3:1 |
| hsa-miR-523-3p   | OR | 4.29 | 0.83–25.24  | 23.5:1 |
| hsa-miR-144-3p   | OR | 7.71 | 0.68–115.87 | 22.8:1 |
| hsa-miR-518f-3p  | OR | 0.04 | 0–2.68      | 22.6:1 |
| hsa-miR-96-5p    | OR | 0.03 | 0–2.16      | 22.4:1 |
| hsa-miR-92a-3p   | FC | 2.89 | 0.88–9.7    | 22.3:1 |
| hsa-miR-452-5p   | FC | 0.28 | 0.07–1.16   | 22.3:1 |
| hsa-miR-548m     | OR | 6.72 | 0.68–101.05 | 22.1:1 |
| hsa-miR-328      | OR | 3.99 | 0.84–22.71  | 22:01  |
| hsa-miR-320a     | FC | 0.36 | 0.12–1.19   | 21.7:1 |
| hsa-miR-193a-3p  | OR | 0.04 | 0–2.57      | 21.2:1 |
| hsa-miR-520a-5p  | OR | 0.04 | 0–1.87      | 21:01  |
| hsa-miR-1181     | OR | 3.79 | 0.72–17.15  | 20:01  |
| hsa-miR-132-5p   | OR | 4.06 | 0.76–21.91  | 19.9:1 |
| hsa-miR-149-3p   | FC | 3.19 | 0.75–11.28  | 19.6:1 |
| hsa-miR-345-5p   | OR | 6.5  | 0.6–77.9    | 19.3:1 |
| hsa-miR-486-5p   | OR | 3.77 | 0.79–18.6   | 19.1:1 |
| hsa-miR-411-3p   | OR | 3.94 | 0.81–23.58  | 17.7:1 |
| hsa-miR-720      | FC | 0.39 | 0.12–1.23   | 17.3:1 |
| hsa-miR-423-5p   | FC | 2.84 | 0.8–10.58   | 17.3:1 |
| hsa-miR-100-5p   | FC | 0.36 | 0.1–1.21    | 17.2:1 |
| hsa-miR-29b-1-5p | FC | 2.54 | 0.73–7.36   | 16.9:1 |
| hsa-miR-1260a    | FC | 0.39 | 0.12–1.27   | 16.5:1 |
| hsa-miR-1538     | FC | 3.2  | 0.78–14.64  | 16.4:1 |
| hsa-miR-652-3p   | OR | 0.26 | 0.04–1.36   | 15.9:1 |
| hsa-miR-920      | OR | 0.18 | 0.02–1.57   | 15.9:1 |
| hsa-miR-140-5p   | OR | 3.52 | 0.7–18.2    | 15.9:1 |
| hsa-miR-216b     | OR | 4.17 | 0.73–33.55  | 15.3:1 |
| hsa-miR-203      | FC | 0.37 | 0.1–1.21    | 15.1:1 |
| hsa-miR-1182     | OR | 0.05 | 0–3.01      | 14.9:1 |
| hsa-miR-517c-3p  | OR | 4.2  | 0.67–32.17  | 14.9:1 |
| hsa-miR-323a-5p  | OR | 5.63 | 0.57–70.71  | 14.7:1 |
| hsa-miR-125b-5p  | FC | 0.39 | 0.11–1.35   | 14.5:1 |
| hsa-miR-199b-5p  | OR | 0.04 | 0–3.45      | 14.4:1 |
| hsa-miR-630      | OR | 0.05 | 0–3.5       | 14:01  |
| hsa-miR-604      | FC | 2.48 | 0.78–8.26   | 13.7:1 |
| hsa-miR-145-5p   | OR | 3.31 | 0.71–18.2   | 13.6:1 |
| hsa-miR-324-5p   | OR | 3.23 | 0.66–14.93  | 13.6:1 |
| hsa-miR-181b-5p  | OR | 3.19 | 0.65–14.98  | 13.1:1 |
| hsa-miR-146a-3p  | OR | 3.87 | 0.61–27.94  | 13:01  |
| hsa-miR-101-3p   | FC | 0.31 | 0.06–1.54   | 12.7:1 |
| hsa-miR-224-3p   | OR | 3.35 | 0.61–18.29  | 12.4:1 |
| hsa-miR-570-3p   | OR | 0.2  | 0.02–2.02   | 12.3:1 |
| hsa-miR-642a-5p  | OR | 3.02 | 0.65–14.76  | 12.3:1 |
| hsa-miR-19a-3p   | FC | 0.34 | 0.08–1.59   | 12:01  |
| hsa-miR-373-5p   | FC | 2.42 | 0.7–7.85    | 11.8:1 |
| hsa-miR-24-2-5p  | OR | 3.18 | 0.64–18.3   | 11.5:1 |
| hsa-miR-24-3p    | FC | 0.43 | 0.13–1.42   | 11.2:1 |

CI 95, 95% confidence intervals; POR, posterior odds ratio; FC, fold change; OR, odd ratio.

|                  |    |      |            |        |
|------------------|----|------|------------|--------|
| hsa-miR-489      | OR | 3.16 | 0.57–17.38 | 11:01  |
| hsa-miR-105-3p   | FC | 0.41 | 0.12–1.5   | 10.8:1 |
| hsa-miR-195-3p   | OR | 2.92 | 0.59–13    | 10.7:1 |
| hsa-miR-361-5p   | OR | 0.06 | 0–3.61     | 10.6:1 |
| hsa-miR-892a     | OR | 0.06 | 0–3.66     | 10.5:1 |
| hsa-miR-365a-3p  | OR | 3.18 | 0.57–18.26 | 10.5:1 |
| hsa-miR-138-2-3p | OR | 0.06 | 0–3.21     | 10.4:1 |
| hsa-miR-429      | FC | 0.42 | 0.12–1.44  | 10.4:1 |
| hsa-miR-20a-3p   | OR | 0.06 | 0–4.96     | 10.4:1 |
| hsa-miR-25-5p    | OR | 0.06 | 0–3.33     | 10.3:1 |
| hsa-miR-873-5p   | OR | 0.06 | 0–3.63     | 10.1:1 |
| hsa-miR-185-3p   | FC | 0.4  | 0.1–1.49   | 10.1:1 |
| hsa-miR-218-5p   | OR | 3.11 | 0.59–17.36 | 10:01  |
| hsa-miR-605      | FC | 0.46 | 0.15–1.48  | 9.6:1  |
| hsa-miR-659-3p   | OR | 0.06 | 0–3.05     | 9.6:1  |
| hsa-miR-330-3p   | OR | 0.07 | 0–3.74     | 9.3:1  |
| hsa-miR-133b     | OR | 0.07 | 0–3.43     | 9.3:1  |
| hsa-miR-23b-3p   | FC | 0.46 | 0.14–1.46  | 9.3:1  |
| hsa-miR-15b-3p   | OR | 0.07 | 0–3.7      | 9.2:1  |
| hsa-miR-758      | OR | 0.06 | 0–3.82     | 9:01   |
| hsa-miR-2113     | OR | 0.26 | 0.03–2.23  | 9:01   |
| hsa-miR-555      | FC | 0.44 | 0.12–1.57  | 8.8:1  |
| hsa-miR-363-3p   | OR | 0.29 | 0.04–1.87  | 8.8:1  |
| hsa-miR-21-5p    | FC | 0.47 | 0.13–1.41  | 8.8:1  |
| hsa-miR-510      | OR | 2.84 | 0.56–14.93 | 8.7:1  |
| hsa-miR-629-5p   | OR | 2.72 | 0.54–13.1  | 8.7:1  |
| hsa-miR-637      | OR | 0.07 | 0–3.34     | 8.6:1  |
| hsa-miR-30a-3p   | FC | 0.46 | 0.15–1.55  | 8.6:1  |
| hsa-miR-593-5p   | OR | 0.26 | 0.02–2.14  | 8.6:1  |
| hsa-miR-1911-3p  | OR | 0.27 | 0.03–2.13  | 8.6:1  |
| hsa-miR-543      | FC | 2.07 | 0.67–6.51  | 8.4:1  |
| hsa-miR-30c-5p   | FC | 0.45 | 0.13–1.59  | 8.4:1  |
| hsa-miR-539-5p   | OR | 0.27 | 0.03–2.33  | 8.4:1  |
| hsa-miR-19b-3p   | FC | 0.42 | 0.1–1.7    | 8:01   |
| hsa-miR-551b-3p  | OR | 4.32 | 0.4–64.46  | 7.8:1  |
| hsa-miR-29a-5p   | OR | 2.54 | 0.51–12.07 | 7.7:1  |
| hsa-miR-511      | OR | 4.31 | 0.34–54.36 | 7.7:1  |
| hsa-miR-519e-5p  | OR | 4.28 | 0.33–55.75 | 7.7:1  |
| hsa-miR-154-5p   | OR | 4.37 | 0.36–66.64 | 7.7:1  |
| hsa-miR-93-5p    | FC | 0.5  | 0.17–1.7   | 7.7:1  |
| hsa-miR-192-5p   | FC | 2.15 | 0.63–7.36  | 7.6:1  |
| hsa-miR-1912     | OR | 0.34 | 0.05–2.19  | 7.6:1  |
| hsa-miR-141-5p   | FC | 1.99 | 0.61–5.87  | 7.6:1  |
| hsa-miR-28-5p    | OR | 0.37 | 0.07–1.94  | 7.5:1  |
| hsa-miR-103b     | FC | 2.43 | 0.61–11.35 | 7.4:1  |
| hsa-miR-1271-5p  | OR | 4.11 | 0.32–49.69 | 7.4:1  |
| hsa-miR-1914-3p  | OR | 3.34 | 0.44–29.27 | 7.4:1  |
| hsa-miR-371a-3p  | OR | 3.16 | 0.42–22.57 | 7.2:1  |
| hsa-miR-548c-5p  | OR | 2.56 | 0.5–12.51  | 7.1:1  |
| hsa-miR-136-5p   | OR | 3.15 | 0.47–23.88 | 7:01   |

CI 95, 95% confidence intervals; POR, posterior odds ratio; FC, fold change; OR, odd ratio.

|                   |    |      |            |       |
|-------------------|----|------|------------|-------|
| hsa-miR-877-3p    | FC | 1.95 | 0.64–6.05  | 7:01  |
| hsa-miR-663b      | FC | 2.3  | 0.58–9.91  | 6.9:1 |
| hsa-miR-26b-3p    | OR | 4.19 | 0.36–59.1  | 6.9:1 |
| hsa-miR-26a-5p    | FC | 0.51 | 0.16–1.62  | 6.9:1 |
| hsa-miR-887       | OR | 2.47 | 0.55–12.26 | 6.9:1 |
| hsa-miR-200a-3p   | FC | 0.48 | 0.14–1.72  | 6.8:1 |
| hsa-miR-154-3p    | OR | 2.91 | 0.48–21.82 | 6.8:1 |
| hsa-miR-639       | FC | 1.96 | 0.6–6.08   | 6.7:1 |
| hsa-miR-183-5p    | FC | 0.48 | 0.14–1.82  | 6.7:1 |
| hsa-miR-18b-5p    | FC | 0.5  | 0.15–1.64  | 6.6:1 |
| hsa-miR-1238      | OR | 3.07 | 0.42–22.4  | 6.6:1 |
| hsa-miR-16-5p     | FC | 0.48 | 0.14–1.76  | 6.6:1 |
| hsa-miR-221-3p    | FC | 0.45 | 0.11–1.85  | 6.6:1 |
| hsa-miR-1183      | FC | 1.9  | 0.62–5.81  | 6.5:1 |
| hsa-miR-654-3p    | FC | 1.96 | 0.6–6.39   | 6.5:1 |
| hsa-miR-10a-5p    | FC | 0.5  | 0.14–1.62  | 6.5:1 |
| hsa-miR-525-3p    | OR | 3.61 | 0.34–45.22 | 6.5:1 |
| hsa-miR-517a-3p   | OR | 3.64 | 0.33–43.72 | 6.4:1 |
| hsa-miR-580       | OR | 3.68 | 0.33–40.82 | 6.4:1 |
| hsa-miR-7-1-3p    | OR | 2.4  | 0.53–11.65 | 6.4:1 |
| hsa-miR-148a-3p   | FC | 0.42 | 0.09–2.03  | 6.4:1 |
| hsa-let-7f-1-3p   | OR | 3.64 | 0.28–38.72 | 6.3:1 |
| hsa-miR-147b      | OR | 3.58 | 0.32–41.79 | 6.3:1 |
| hsa-miR-372       | OR | 3.7  | 0.32–52.66 | 6.3:1 |
| hsa-miR-30e-3p    | FC | 0.5  | 0.14–1.63  | 6.2:1 |
| hsa-miR-144-5p    | OR | 3.68 | 0.28–46.17 | 6.2:1 |
| hsa-miR-298       | OR | 3.5  | 0.35–41.5  | 6.2:1 |
| hsa-miR-512-5p    | OR | 3.6  | 0.34–47    | 6.1:1 |
| hsa-miR-942       | OR | 0.1  | 0–5.04     | 6.1:1 |
| hsa-miR-296-5p    | OR | 0.09 | 0–6.16     | 6.1:1 |
| hsa-miR-196b-3p   | OR | 0.09 | 0–4.9      | 6.1:1 |
| hsa-miR-625-3p    | OR | 3.65 | 0.36–49.78 | 6.1:1 |
| hsa-miR-590-5p    | OR | 2.57 | 0.44–15.29 | 6.1:1 |
| hsa-miR-628-3p    | OR | 2.57 | 0.43–15.27 | 6:01  |
| hsa-let-7g-3p     | OR | 0.1  | 0–5.26     | 6:01  |
| hsa-miR-181a-2-3p | OR | 0.39 | 0.07–2.09  | 6:01  |
| hsa-miR-662       | FC | 0.45 | 0.11–1.93  | 5.9:1 |
| hsa-miR-638       | FC | 0.54 | 0.17–1.65  | 5.9:1 |
| hsa-miR-141-3p    | FC | 0.5  | 0.14–1.75  | 5.9:1 |
| hsa-miR-487a      | OR | 3.55 | 0.31–49.34 | 5.9:1 |
| hsa-miR-889       | OR | 0.1  | 0–5.13     | 5.8:1 |
| hsa-miR-933       | OR | 0.09 | 0–7.67     | 5.8:1 |
| hsa-miR-374b-3p   | OR | 0.1  | 0–5.66     | 5.8:1 |
| hsa-miR-22-5p     | OR | 0.1  | 0–5.25     | 5.8:1 |
| hsa-miR-27b-3p    | FC | 0.51 | 0.14–1.64  | 5.7:1 |
| hsa-miR-361-3p    | FC | 0.5  | 0.13–1.77  | 5.7:1 |
| hsa-miR-148b-5p   | OR | 0.1  | 0–5.72     | 5.7:1 |
| hsa-miR-888-3p    | OR | 0.1  | 0–5.1      | 5.7:1 |
| hsa-miR-15a-3p    | OR | 0.1  | 0–4.81     | 5.7:1 |
| hsa-miR-1200      | OR | 0.1  | 0–5.28     | 5.6:1 |

CI 95, 95% confidence intervals; POR, posterior odds ratio; FC, fold change; OR, odd ratio.

|                  |    |      |            |       |
|------------------|----|------|------------|-------|
| hsa-miR-26a-1-3p | OR | 0.1  | 0–5.32     | 5.6:1 |
| hsa-miR-20b-3p   | OR | 0.1  | 0–7.02     | 5.6:1 |
| hsa-miR-323b-5p  | FC | 2.06 | 0.54–8.5   | 5.6:1 |
| hsa-miR-375      | FC | 0.53 | 0.16–1.73  | 5.6:1 |
| hsa-miR-663a     | FC | 0.53 | 0.17–1.79  | 5.6:1 |
| hsa-miR-592      | OR | 0.1  | 0–5.77     | 5.5:1 |
| hsa-miR-1265     | OR | 0.1  | 0–6.4      | 5.5:1 |
| hsa-let-7a-2-3p  | OR | 0.1  | 0–5.39     | 5.5:1 |
| hsa-miR-296-3p   | OR | 0.33 | 0.03–3.09  | 5.5:1 |
| hsa-miR-556-5p   | OR | 0.1  | 0–5.48     | 5.5:1 |
| hsa-miR-634      | OR | 0.1  | 0–6.53     | 5.5:1 |
| hsa-miR-614      | OR | 0.1  | 0–6.48     | 5.4:1 |
| hsa-miR-135b-3p  | OR | 0.1  | 0–6.81     | 5.4:1 |
| hsa-miR-506-3p   | OR | 0.1  | 0–6.6      | 5.4:1 |
| hsa-miR-520d-3p  | FC | 0.47 | 0.11–2.02  | 5.4:1 |
| hsa-miR-106b-3p  | OR | 2.41 | 0.47–14.92 | 5.3:1 |
| hsa-miR-664-3p   | OR | 2.16 | 0.45–9.63  | 5.2:1 |
| hsa-miR-188-5p   | OR | 2.36 | 0.39–13.44 | 5.2:1 |
| hsa-miR-548i     | OR | 3.13 | 0.3–42.22  | 5:01  |
| hsa-miR-553      | OR | 0.11 | 0–6.06     | 5:01  |
| hsa-miR-636      | FC | 2.02 | 0.48–8.03  | 5:01  |
| hsa-miR-602      | FC | 0.53 | 0.16–1.95  | 5:01  |
| hsa-miR-130b-5p  | OR | 3    | 0.29–34.11 | 5:01  |
| hsa-miR-133a     | OR | 0.35 | 0.03–2.92  | 5:01  |
| hsa-miR-198      | OR | 2.51 | 0.36–17.59 | 5:01  |
| hsa-miR-211-5p   | OR | 2.54 | 0.34–17.73 | 5:01  |
| hsa-miR-616-3p   | OR | 0.34 | 0.03–2.75  | 4.9:1 |
| hsa-miR-370      | OR | 0.34 | 0.03–3.07  | 4.9:1 |
| hsa-miR-134      | FC | 1.75 | 0.54–5.55  | 4.9:1 |
| hsa-miR-615-5p   | OR | 0.11 | 0–8.04     | 4.9:1 |
| hsa-miR-409-5p   | OR | 0.12 | 0–7.32     | 4.9:1 |
| hsa-miR-891b     | OR | 0.1  | 0–7.55     | 4.9:1 |
| hsa-miR-219-1-3p | OR | 2.99 | 0.29–35.96 | 4.9:1 |
| hsa-miR-1270     | OR | 3    | 0.28–31.88 | 4.8:1 |
| hsa-miR-33b-5p   | OR | 0.12 | 0–6.98     | 4.8:1 |
| hsa-miR-9-3p     | OR | 2.26 | 0.38–12.16 | 4.8:1 |
| hsa-miR-31-5p    | FC | 0.55 | 0.16–2.02  | 4.8:1 |
| hsa-miR-876-5p   | OR | 0.11 | 0–6.55     | 4.8:1 |
| hsa-miR-1256     | OR | 2.48 | 0.38–16.79 | 4.8:1 |
| hsa-miR-34b-3p   | OR | 0.11 | 0–7.67     | 4.8:1 |
| hsa-miR-323a-3p  | OR | 0.11 | 0–5.85     | 4.8:1 |
| hsa-miR-660-5p   | FC | 0.5  | 0.13–2.1   | 4.8:1 |
| hsa-miR-34c-5p   | OR | 0.12 | 0–6.45     | 4.8:1 |
| hsa-miR-455-3p   | OR | 2.06 | 0.43–9.58  | 4.7:1 |
| hsa-miR-601      | OR | 0.12 | 0–9.1      | 4.7:1 |
| hsa-miR-105-5p   | OR | 0.11 | 0–7.13     | 4.7:1 |
| hsa-miR-19b-2-5p | OR | 2.1  | 0.46–10.17 | 4.7:1 |
| hsa-miR-190b     | OR | 0.12 | 0–6        | 4.7:1 |
| hsa-miR-505-5p   | FC | 0.51 | 0.12–2.16  | 4.7:1 |
| hsa-miR-654-5p   | OR | 0.12 | 0–6.89     | 4.7:1 |

CI 95, 95% confidence intervals; POR, posterior odds ratio; FC, fold change; OR, odd ratio.

|                  |    |      |            |       |
|------------------|----|------|------------|-------|
| hsa-miR-641      | OR | 0.12 | 0–6.42     | 4.7:1 |
| hsa-miR-513a-5p  | OR | 0.12 | 0–6.28     | 4.6:1 |
| hsa-miR-143-3p   | OR | 2.12 | 0.4–10.33  | 4.6:1 |
| hsa-miR-941      | OR | 0.12 | 0–5.21     | 4.6:1 |
| hsa-miR-501-3p   | OR | 2.14 | 0.41–10.71 | 4.6:1 |
| hsa-miR-151a-5p  | FC | 0.55 | 0.16–1.95  | 4.6:1 |
| hsa-miR-194-3p   | OR | 2.12 | 0.37–9.45  | 4.5:1 |
| hsa-miR-615-3p   | FC | 0.59 | 0.19–1.93  | 4.4:1 |
| hsa-miR-200c-3p  | FC | 0.59 | 0.18–1.88  | 4.3:1 |
| hsa-miR-550a-5p  | OR | 1.99 | 0.41–8.98  | 4.3:1 |
| hsa-miR-223-3p   | FC | 0.54 | 0.13–2.14  | 4.3:1 |
| hsa-miR-1255b-5p | OR | 2.17 | 0.37–11.82 | 4.3:1 |
| hsa-miR-187-3p   | OR | 0.48 | 0.09–2.26  | 4.2:1 |
| hsa-miR-622      | OR | 1.99 | 0.42–9.27  | 4.2:1 |
| hsa-miR-1972     | FC | 0.56 | 0.16–2.14  | 4.1:1 |
| hsa-miR-545-3p   | OR | 2.02 | 0.42–11.12 | 4.1:1 |
| hsa-miR-532-3p   | FC | 1.84 | 0.49–7.44  | 4.1:1 |
| hsa-miR-99a-5p   | FC | 0.58 | 0.18–2.1   | 4.1:1 |
| hsa-miR-149-5p   | FC | 0.59 | 0.16–2.03  | 4:01  |
| hsa-miR-184      | OR | 0.39 | 0.04–3.05  | 4:01  |
| hsa-miR-491-5p   | OR | 0.5  | 0.1–2.63   | 4:01  |
| hsa-miR-30d-5p   | FC | 0.59 | 0.17–1.95  | 4:01  |
| hsa-let-7f-5p    | FC | 0.59 | 0.16–1.98  | 3.9:1 |
| hsa-miR-299-5p   | OR | 0.46 | 0.07–2.87  | 3.9:1 |
| hsa-miR-182-3p   | FC | 0.6  | 0.18–2.04  | 3.8:1 |
| hsa-miR-1269a    | OR | 1.91 | 0.41–8.72  | 3.8:1 |
| hsa-miR-491-3p   | OR | 0.42 | 0.04–3.11  | 3.8:1 |
| hsa-miR-30c-2-3p | OR | 1.87 | 0.39–8.46  | 3.8:1 |
| hsa-miR-675-3p   | OR | 1.92 | 0.36–8.24  | 3.8:1 |
| hsa-miR-598      | FC | 0.6  | 0.19–2.02  | 3.7:1 |
| hsa-miR-505-3p   | FC | 1.86 | 0.38–7.89  | 3.7:1 |
| hsa-miR-222-3p   | FC | 0.6  | 0.18–2.1   | 3.7:1 |
| hsa-miR-612      | OR | 0.47 | 0.08–3.01  | 3.7:1 |
| hsa-miR-30c-1-3p | OR | 0.41 | 0.04–3.27  | 3.6:1 |
| hsa-miR-744-3p   | FC | 1.56 | 0.52–4.79  | 3.6:1 |
| hsa-miR-1914-5p  | OR | 0.51 | 0.09–2.83  | 3.5:1 |
| hsa-miR-376a-3p  | OR | 2.04 | 0.33–11.53 | 3.5:1 |
| hsa-miR-331-5p   | FC | 0.64 | 0.22–2.12  | 3.5:1 |
| hsa-miR-188-3p   | FC | 0.64 | 0.21–2.06  | 3.5:1 |
| hsa-miR-200b-5p  | FC | 0.59 | 0.16–2.2   | 3.5:1 |
| hsa-miR-22-3p    | FC | 0.6  | 0.16–2.2   | 3.5:1 |
| hsa-miR-132-3p   | FC | 1.57 | 0.49–5     | 3.4:1 |
| hsa-miR-10b-5p   | FC | 0.64 | 0.2–2.15   | 3.3:1 |
| hsa-miR-29b-3p   | FC | 0.61 | 0.16–2.34  | 3.3:1 |
| hsa-miR-484      | FC | 0.64 | 0.19–2.03  | 3.3:1 |
| hsa-miR-106b-5p  | OR | 0.55 | 0.11–2.69  | 3.3:1 |
| hsa-miR-558      | FC | 0.64 | 0.18–2.18  | 3.3:1 |
| hsa-miR-152      | FC | 1.68 | 0.38–6.53  | 3.2:1 |
| hsa-miR-106a-5p  | FC | 0.63 | 0.17–2.29  | 3.2:1 |
| hsa-miR-212-3p   | FC | 1.64 | 0.38–5.87  | 3.1:1 |

CI 95, 95% confidence intervals; POR, posterior odds ratio; FC, fold change; OR, odd ratio.

|                  |    |      |            |       |
|------------------|----|------|------------|-------|
| hsa-miR-1237     | OR | 0.53 | 0.08–2.78  | 3.1:1 |
| hsa-let-7d-3p    | FC | 0.66 | 0.2–2.11   | 3.1:1 |
| hsa-miR-1        | OR | 1.87 | 0.33–12.71 | 3.1:1 |
| hsa-miR-99b-3p   | OR | 1.68 | 0.36–7.31  | 3.1:1 |
| hsa-miR-302d-3p  | OR | 0.44 | 0.04–4.12  | 3.1:1 |
| hsa-miR-1254     | OR | 1.72 | 0.36–7.84  | 3.1:1 |
| hsa-miR-193a-5p  | FC | 0.64 | 0.18–2.36  | 3.1:1 |
| hsa-miR-10b-3p   | OR | 0.53 | 0.08–3.27  | 3.1:1 |
| hsa-miR-425-5p   | FC | 0.59 | 0.12–2.57  | 3.1:1 |
| hsa-miR-425-3p   | OR | 0.57 | 0.1–2.97   | 3.1:1 |
| hsa-miR-339-5p   | FC | 0.63 | 0.17–2.58  | 3.1:1 |
| hsa-miR-455-5p   | OR | 1.88 | 0.28–10.94 | 3:01  |
| hsa-miR-326      | OR | 0.53 | 0.08–3.27  | 3:01  |
| hsa-miR-193b-5p  | OR | 0.56 | 0.1–2.86   | 3:01  |
| hsa-miR-410      | OR | 2.02 | 0.23–15.9  | 3:01  |
| hsa-miR-512-3p   | OR | 1.86 | 0.31–12.57 | 3:01  |
| hsa-miR-376c     | OR | 1.69 | 0.37–7.91  | 3:01  |
| hsa-miR-20b-5p   | OR | 0.56 | 0.11–2.99  | 2.9:1 |
| hsa-miR-382-5p   | OR | 2.03 | 0.25–16.69 | 2.9:1 |
| hsa-miR-10a-3p   | OR | 1.66 | 0.37–7.28  | 2.9:1 |
| hsa-miR-1207-5p  | FC | 0.68 | 0.22–2.11  | 2.9:1 |
| hsa-miR-608      | OR | 1.69 | 0.35–8.79  | 2.9:1 |
| hsa-miR-514a-3p  | OR | 1.79 | 0.3–11.68  | 2.9:1 |
| hsa-miR-27a-3p   | FC | 0.67 | 0.19–2.25  | 2.9:1 |
| hsa-miR-138-5p   | OR | 0.58 | 0.1–2.9    | 2.8:1 |
| hsa-miR-301a-3p  | OR | 1.79 | 0.26–11.01 | 2.8:1 |
| hsa-miR-1468     | FC | 0.62 | 0.14–2.77  | 2.8:1 |
| hsa-miR-192-3p   | OR | 1.91 | 0.22–13.89 | 2.8:1 |
| hsa-miR-562      | FC | 0.69 | 0.22–2.16  | 2.8:1 |
| hsa-miR-205-5p   | FC | 0.67 | 0.21–2.53  | 2.8:1 |
| hsa-miR-518a-3p  | OR | 1.91 | 0.25–14.65 | 2.8:1 |
| hsa-let-7d-5p    | FC | 0.64 | 0.15–2.54  | 2.7:1 |
| hsa-miR-517b-3p  | OR | 0.21 | 0–12.09    | 2.7:1 |
| hsa-miR-550a-3p  | OR | 1.75 | 0.29–10.23 | 2.7:1 |
| hsa-miR-302a-5p  | OR | 1.69 | 0.33–9.41  | 2.7:1 |
| hsa-miR-148a-5p  | OR | 1.85 | 0.24–13.99 | 2.7:1 |
| hsa-miR-155-3p   | OR | 0.23 | 0–19.92    | 2.7:1 |
| hsa-miR-204-5p   | FC | 0.69 | 0.21–2.32  | 2.7:1 |
| hsa-miR-548j     | OR | 1.85 | 0.25–15.07 | 2.7:1 |
| hsa-miR-623      | OR | 1.72 | 0.29–10.2  | 2.7:1 |
| hsa-miR-487b     | OR | 0.2  | 0–14.29    | 2.7:1 |
| hsa-miR-646      | OR | 1.73 | 0.3–10.43  | 2.7:1 |
| hsa-miR-135b-5p  | OR | 1.58 | 0.34–7.53  | 2.7:1 |
| hsa-miR-130b-3p  | OR | 0.2  | 0–14.05    | 2.7:1 |
| hsa-miR-1204     | OR | 0.21 | 0–16.26    | 2.7:1 |
| hsa-miR-600      | OR | 0.2  | 0–12.42    | 2.7:1 |
| hsa-miR-19b-1-5p | OR | 0.22 | 0–15.34    | 2.7:1 |
| hsa-miR-588      | OR | 0.2  | 0–13.65    | 2.7:1 |
| hsa-miR-450b-5p  | OR | 0.21 | 0–16.6     | 2.6:1 |
| hsa-miR-890      | OR | 0.2  | 0–16.9     | 2.6:1 |

CI 95, 95% confidence intervals; POR, posterior odds ratio; FC, fold change; OR, odd ratio.

|                 |    |      |            |       |
|-----------------|----|------|------------|-------|
| hsa-miR-519a-3p | OR | 0.21 | 0–15.08    | 2.6:1 |
| hsa-miR-181c-3p | OR | 0.21 | 0–16.47    | 2.6:1 |
| hsa-miR-494     | OR | 0.21 | 0–12.69    | 2.6:1 |
| hsa-miR-513a-3p | OR | 0.21 | 0–14.63    | 2.6:1 |
| hsa-miR-93-3p   | OR | 1.64 | 0.28–7.72  | 2.6:1 |
| hsa-miR-1537    | OR | 0.21 | 0–15.23    | 2.6:1 |
| hsa-miR-422a    | OR | 0.2  | 0–16.64    | 2.6:1 |
| hsa-miR-100-3p  | OR | 0.2  | 0–15.74    | 2.6:1 |
| hsa-miR-339-3p  | OR | 1.66 | 0.3–8.44   | 2.6:1 |
| hsa-miR-518c-3p | OR | 0.21 | 0–13.58    | 2.6:1 |
| hsa-miR-767-5p  | OR | 0.21 | 0–13.69    | 2.6:1 |
| hsa-miR-1236    | OR | 0.2  | 0–17.4     | 2.6:1 |
| hsa-miR-1245a   | OR | 0.21 | 0–16.33    | 2.6:1 |
| hsa-miR-647     | OR | 0.21 | 0–15.92    | 2.6:1 |
| hsa-miR-1185-5p | OR | 0.21 | 0–16.76    | 2.6:1 |
| hsa-miR-208b    | OR | 0.2  | 0–14.1     | 2.6:1 |
| hsa-miR-520c-3p | OR | 0.21 | 0–14.24    | 2.6:1 |
| hsa-miR-579     | OR | 0.22 | 0–16.35    | 2.6:1 |
| hsa-miR-202-5p  | OR | 0.21 | 0–19.13    | 2.6:1 |
| hsa-miR-96-3p   | OR | 0.21 | 0–12.29    | 2.6:1 |
| hsa-miR-369-5p  | OR | 0.22 | 0–15.64    | 2.6:1 |
| hsa-miR-518b    | OR | 0.22 | 0–16.89    | 2.6:1 |
| hsa-miR-363-5p  | OR | 0.21 | 0–17.57    | 2.6:1 |
| hsa-miR-516b-5p | OR | 0.22 | 0–13.57    | 2.6:1 |
| hsa-miR-607     | OR | 0.21 | 0–24.15    | 2.6:1 |
| hsa-miR-921     | OR | 0.22 | 0–14.52    | 2.6:1 |
| hsa-miR-1206    | OR | 0.2  | 0–15.71    | 2.6:1 |
| hsa-miR-302b-3p | OR | 0.21 | 0–16.07    | 2.6:1 |
| hsa-miR-378a-5p | OR | 1.86 | 0.26–15.12 | 2.6:1 |
| hsa-miR-377-3p  | OR | 0.22 | 0–15.86    | 2.6:1 |
| hsa-miR-21-3p   | OR | 0.22 | 0–14.04    | 2.6:1 |
| hsa-miR-367-3p  | OR | 0.21 | 0–17.62    | 2.6:1 |
| hsa-miR-302e    | OR | 0.21 | 0–15.28    | 2.6:1 |
| hsa-miR-519e-3p | OR | 0.21 | 0–14.42    | 2.6:1 |
| hsa-miR-337-3p  | OR | 0.22 | 0–15.99    | 2.6:1 |
| hsa-miR-137     | OR | 0.21 | 0–19.02    | 2.6:1 |
| hsa-miR-521     | OR | 0.22 | 0–11.08    | 2.6:1 |
| hsa-miR-520e    | OR | 0.21 | 0–14.05    | 2.6:1 |
| hsa-miR-520g    | OR | 0.21 | 0–16.82    | 2.6:1 |
| hsa-miR-449a    | OR | 0.21 | 0–18       | 2.6:1 |
| hsa-miR-376a-5p | OR | 0.23 | 0–15.96    | 2.5:1 |
| hsa-miR-938     | OR | 0.22 | 0–10.67    | 2.5:1 |
| hsa-miR-449b-5p | FC | 1.56 | 0.33–6.55  | 2.5:1 |
| hsa-miR-1179    | OR | 0.63 | 0.12–2.84  | 2.5:1 |
| hsa-miR-1248    | OR | 0.21 | 0–16.18    | 2.5:1 |
| hsa-miR-145-3p  | OR | 0.21 | 0–20.65    | 2.5:1 |
| hsa-miR-519b-3p | OR | 0.23 | 0–14.25    | 2.5:1 |
| hsa-miR-183-3p  | OR | 0.21 | 0–17.27    | 2.5:1 |
| hsa-miR-524-3p  | OR | 0.22 | 0–17.51    | 2.5:1 |
| hsa-miR-591     | OR | 0.22 | 0–15.76    | 2.5:1 |

CI 95, 95% confidence intervals; POR, posterior odds ratio; FC, fold change; OR, odd ratio.



|                  |    |      |            |       |
|------------------|----|------|------------|-------|
| hsa-miR-620      | OR | 0.21 | 0–16.13    | 2.5:1 |
| hsa-miR-675-5p   | OR | 0.21 | 0–15.3     | 2.5:1 |
| hsa-miR-519c-3p  | OR | 0.21 | 0–15.98    | 2.5:1 |
| hsa-miR-578      | OR | 0.23 | 0–18.48    | 2.5:1 |
| hsa-miR-26a-2-3p | OR | 0.2  | 0–15.86    | 2.5:1 |
| hsa-miR-520d-5p  | OR | 0.22 | 0–15.65    | 2.5:1 |
| hsa-miR-222-5p   | OR | 0.2  | 0–16       | 2.5:1 |
| hsa-miR-135a-5p  | OR | 0.63 | 0.13–2.93  | 2.5:1 |
| hsa-miR-448      | OR | 0.22 | 0–13.3     | 2.5:1 |
| hsa-miR-297      | FC | 0.73 | 0.24–2.29  | 2.5:1 |
| hsa-miR-432-3p   | OR | 0.22 | 0–15.95    | 2.5:1 |
| hsa-miR-191-3p   | OR | 0.21 | 0–12.85    | 2.5:1 |
| hsa-miR-518a-5p  | OR | 0.21 | 0–15.23    | 2.5:1 |
| hsa-miR-302c-3p  | OR | 0.21 | 0–17.97    | 2.5:1 |
| hsa-miR-490-3p   | FC | 0.72 | 0.22–2.23  | 2.5:1 |
| hsa-miR-488-3p   | OR | 0.22 | 0–15       | 2.5:1 |
| hsa-miR-544a     | OR | 0.22 | 0–14.7     | 2.5:1 |
| hsa-miR-586      | OR | 0.21 | 0–13.6     | 2.5:1 |
| hsa-miR-924      | OR | 0.22 | 0–16.52    | 2.5:1 |
| hsa-miR-135a-3p  | OR | 0.22 | 0–14.75    | 2.5:1 |
| hsa-miR-219-5p   | OR | 0.22 | 0–20.34    | 2.5:1 |
| hsa-miR-599      | OR | 0.21 | 0–17.42    | 2.5:1 |
| hsa-miR-450b-3p  | FC | 1.39 | 0.4–4.24   | 2.5:1 |
| hsa-miR-138-1-3p | OR | 0.22 | 0–14.32    | 2.5:1 |
| hsa-miR-520b     | OR | 0.21 | 0–13.93    | 2.5:1 |
| hsa-miR-610      | OR | 0.22 | 0–14.17    | 2.5:1 |
| hsa-miR-1203     | OR | 1.64 | 0.28–9.64  | 2.5:1 |
| hsa-miR-129-2-3p | OR | 1.83 | 0.22–15.39 | 2.5:1 |
| hsa-miR-335-3p   | OR | 0.22 | 0–14.55    | 2.5:1 |
| hsa-miR-424-3p   | OR | 0.22 | 0–12.43    | 2.5:1 |
| hsa-miR-362-3p   | OR | 0.21 | 0–17.64    | 2.5:1 |
| hsa-miR-518e-3p  | OR | 0.22 | 0–13.27    | 2.5:1 |
| hsa-miR-299-3p   | OR | 0.2  | 0–18.63    | 2.5:1 |
| hsa-miR-936      | OR | 0.63 | 0.13–2.96  | 2.5:1 |
| hsa-miR-380-3p   | OR | 0.22 | 0–17.56    | 2.5:1 |
| hsa-miR-337-5p   | OR | 0.21 | 0–20.94    | 2.5:1 |
| hsa-miR-130a-5p  | OR | 0.21 | 0–19.77    | 2.5:1 |
| hsa-miR-2053     | OR | 0.22 | 0–17.4     | 2.5:1 |
| hsa-miR-556-3p   | OR | 0.22 | 0–14.99    | 2.5:1 |
| hsa-miR-875-5p   | OR | 0.22 | 0–18.16    | 2.5:1 |
| hsa-miR-1264     | OR | 0.22 | 0–12.66    | 2.5:1 |
| hsa-miR-147a     | OR | 0.22 | 0–15.24    | 2.5:1 |
| hsa-miR-876-3p   | OR | 0.22 | 0–15.54    | 2.5:1 |
| hsa-miR-146b-3p  | OR | 0.22 | 0–18.05    | 2.5:1 |
| hsa-miR-515-3p   | OR | 0.22 | 0–17.3     | 2.5:1 |
| hsa-miR-384      | OR | 0.21 | 0–18.87    | 2.5:1 |
| hsa-miR-1178     | OR | 0.22 | 0–15.32    | 2.4:1 |
| hsa-miR-129-1-3p | OR | 0.22 | 0–15.94    | 2.4:1 |
| hsa-miR-335-5p   | OR | 0.63 | 0.13–3.08  | 2.4:1 |
| hsa-miR-498      | OR | 0.23 | 0–15.62    | 2.4:1 |

CI 95, 95% confidence intervals; POR, posterior odds ratio; FC, fold change; OR, odd ratio.

|                   |    |      |            |       |
|-------------------|----|------|------------|-------|
| hsa-miR-520a-3p   | OR | 0.23 | 0–17.99    | 2.4:1 |
| hsa-miR-219-2-3p  | OR | 0.21 | 0–15.91    | 2.4:1 |
| hsa-miR-516a-3p   | OR | 0.22 | 0–14.61    | 2.4:1 |
| hsa-miR-541-5p    | OR | 0.22 | 0–13.87    | 2.4:1 |
| hsa-miR-1252      | OR | 0.24 | 0–14.39    | 2.4:1 |
| hsa-miR-340-5p    | OR | 0.23 | 0–15.86    | 2.4:1 |
| hsa-miR-15a-5p    | FC | 1.52 | 0.36–6.79  | 2.4:1 |
| hsa-miR-1263      | OR | 0.23 | 0–14.35    | 2.4:1 |
| hsa-miR-500a-5p   | OR | 0.64 | 0.14–3.19  | 2.4:1 |
| hsa-miR-548h-5p   | OR | 1.53 | 0.31–7.16  | 2.4:1 |
| hsa-miR-29c-5p    | OR | 1.56 | 0.33–7.44  | 2.4:1 |
| hsa-miR-1243      | OR | 0.23 | 0–18.58    | 2.4:1 |
| hsa-miR-200c-5p   | OR | 0.22 | 0–18.3     | 2.4:1 |
| hsa-miR-561-3p    | OR | 0.22 | 0–15.34    | 2.4:1 |
| hsa-miR-626       | OR | 0.23 | 0–16.7     | 2.4:1 |
| hsa-miR-503       | OR | 1.53 | 0.29–7.59  | 2.4:1 |
| hsa-miR-330-5p    | OR | 1.69 | 0.19–11.06 | 2.4:1 |
| hsa-miR-409-3p    | OR | 1.55 | 0.29–7.97  | 2.4:1 |
| hsa-miR-658       | OR | 1.71 | 0.2–11.43  | 2.4:1 |
| hsa-miR-27b-5p    | OR | 1.91 | 0.12–25.02 | 2.4:1 |
| hsa-miR-18b-3p    | OR | 1.71 | 0.21–12.37 | 2.3:1 |
| hsa-miR-300       | FC | 1.5  | 0.35–6.84  | 2.3:1 |
| hsa-miR-542-5p    | OR | 1.55 | 0.29–7.72  | 2.3:1 |
| hsa-miR-765       | FC | 1.39 | 0.43–4.58  | 2.3:1 |
| hsa-let-7a-3p     | OR | 1.88 | 0.13–28.02 | 2.3:1 |
| hsa-miR-23a-5p    | OR | 1.7  | 0.22–13.04 | 2.3:1 |
| hsa-miR-34b-5p    | OR | 1.54 | 0.31–8.17  | 2.3:1 |
| hsa-miR-125b-1-3p | OR | 1.73 | 0.25–14.47 | 2.3:1 |
| hsa-miR-557       | OR | 1.67 | 0.21–12.01 | 2.3:1 |
| hsa-miR-627       | OR | 0.54 | 0.06–5.46  | 2.3:1 |
| hsa-miR-103a-3p   | FC | 1.32 | 0.49–3.54  | 2.3:1 |
| hsa-miR-541-3p    | OR | 0.55 | 0.06–5.7   | 2.3:1 |
| hsa-miR-769-5p    | OR | 1.9  | 0.13–31.68 | 2.3:1 |
| hsa-miR-769-3p    | OR | 0.55 | 0.06–4.77  | 2.3:1 |
| hsa-miR-515-5p    | OR | 1.93 | 0.14–25.5  | 2.3:1 |
| hsa-miR-582-5p    | OR | 1.71 | 0.23–12.46 | 2.3:1 |
| hsa-miR-1267      | OR | 1.95 | 0.15–32.31 | 2.3:1 |
| hsa-miR-516a-5p   | OR | 1.91 | 0.12–28.58 | 2.3:1 |
| hsa-miR-99a-3p    | OR | 1.51 | 0.32–7.44  | 2.3:1 |
| hsa-let-7g-5p     | FC | 0.71 | 0.19–2.6   | 2.3:1 |
| hsa-miR-127-5p    | OR | 1.94 | 0.14–26.95 | 2.3:1 |
| hsa-miR-492       | OR | 1.91 | 0.16–33.61 | 2.3:1 |
| hsa-miR-1227      | OR | 0.55 | 0.06–4.76  | 2.2:1 |
| hsa-miR-508-3p    | OR | 1.85 | 0.13–29.69 | 2.2:1 |
| hsa-miR-139-5p    | FC | 0.73 | 0.19–2.41  | 2.2:1 |
| hsa-miR-301b      | OR | 1.89 | 0.15–31.54 | 2.2:1 |
| hsa-miR-522-3p    | OR | 1.88 | 0.13–25.4  | 2.2:1 |
| hsa-miR-379-5p    | OR | 1.87 | 0.1–23.96  | 2.2:1 |
| hsa-miR-548d-5p   | OR | 1.84 | 0.14–26.84 | 2.2:1 |
| hsa-miR-574-3p    | FC | 0.73 | 0.22–2.33  | 2.2:1 |

CI 95, 95% confidence intervals; POR, posterior odds ratio; FC, fold change; OR, odd ratio.

|                   |    |      |            |       |
|-------------------|----|------|------------|-------|
| hsa-miR-454-5p    | OR | 0.68 | 0.15–3.6   | 2.2:1 |
| hsa-miR-23b-5p    | OR | 1.91 | 0.13–29.12 | 2.2:1 |
| hsa-miR-583       | OR | 1.89 | 0.16–35.26 | 2.2:1 |
| hsa-miR-1184      | OR | 0.56 | 0.05–4.78  | 2.2:1 |
| hsa-miR-649       | OR | 1.87 | 0.13–26.31 | 2.2:1 |
| hsa-miR-140-3p    | FC | 1.42 | 0.38–6.16  | 2.2:1 |
| hsa-miR-597       | OR | 1.89 | 0.12–28.35 | 2.2:1 |
| hsa-miR-589-3p    | OR | 1.88 | 0.15–30.2  | 2.2:1 |
| hsa-miR-340-3p    | OR | 0.62 | 0.09–3.9   | 2.2:1 |
| hsa-miR-885-5p    | OR | 1.84 | 0.15–35.65 | 2.2:1 |
| hsa-miR-124-5p    | OR | 1.87 | 0.15–35.06 | 2.2:1 |
| hsa-miR-548a-5p   | OR | 1.87 | 0.12–26.81 | 2.2:1 |
| hsa-miR-499a-3p   | OR | 0.62 | 0.09–3.76  | 2.2:1 |
| hsa-miR-185-5p    | FC | 0.72 | 0.18–2.79  | 2.1:1 |
| hsa-miR-7-2-3p    | OR | 0.61 | 0.08–3.63  | 2.1:1 |
| hsa-miR-518d-3p   | OR | 1.87 | 0.12–25.28 | 2.1:1 |
| hsa-miR-532-5p    | FC | 0.7  | 0.17–2.87  | 2.1:1 |
| hsa-miR-518f-5p   | FC | 0.71 | 0.16–3.03  | 2.1:1 |
| hsa-let-7i-5p     | FC | 0.72 | 0.18–2.85  | 2.1:1 |
| hsa-miR-199a-3p   | OR | 1.87 | 0.14–31.9  | 2.1:1 |
| hsa-miR-95        | FC | 1.43 | 0.33–6.27  | 2.1:1 |
| hsa-miR-376b      | OR | 1.85 | 0.13–35.36 | 2.1:1 |
| hsa-miR-20a-5p    | FC | 0.74 | 0.19–2.63  | 2.1:1 |
| hsa-miR-519d      | OR | 0.6  | 0.07–5.1   | 2.1:1 |
| hsa-miR-33b-3p    | OR | 0.67 | 0.11–3.76  | 2.1:1 |
| hsa-miR-518e-5p   | OR | 0.68 | 0.11–3.57  | 2:01  |
| hsa-miR-18a-5p    | OR | 0.69 | 0.15–3.73  | 2:01  |
| hsa-miR-181a-5p   | FC | 1.36 | 0.37–5.13  | 2:01  |
| hsa-miR-564       | FC | 1.3  | 0.41–3.99  | 2:01  |
| hsa-miR-200a-5p   | OR | 0.68 | 0.12–3.74  | 2:01  |
| hsa-miR-103a-2-5p | OR | 0.6  | 0.07–5.47  | 2:01  |
| hsa-miR-1913      | FC | 0.78 | 0.25–2.57  | 2:01  |
| hsa-miR-9-5p      | FC | 0.72 | 0.16–3.12  | 2:01  |
| hsa-miR-452-3p    | OR | 1.48 | 0.26–9.25  | 2:01  |
| hsa-miR-214-5p    | OR | 1.7  | 0.12–24.66 | 2:01  |
| hsa-miR-650       | FC | 1.28 | 0.38–3.93  | 2:01  |
| hsa-miR-1253      | OR | 1.69 | 0.13–24.59 | 2:01  |
| hsa-miR-526b-3p   | OR | 1.64 | 0.11–20.69 | 1.9:1 |
| hsa-miR-549       | OR | 1.67 | 0.13–22.66 | 1.9:1 |
| hsa-miR-325       | OR | 1.65 | 0.13–23.05 | 1.9:1 |
| hsa-miR-1266      | FC | 1.27 | 0.39–3.8   | 1.9:1 |
| hsa-miR-744-5p    | OR | 0.72 | 0.15–3.26  | 1.9:1 |
| hsa-miR-587       | OR | 1.67 | 0.1–21.75  | 1.9:1 |
| hsa-miR-186-5p    | FC | 1.31 | 0.32–4.79  | 1.9:1 |
| hsa-miR-593-3p    | OR | 0.72 | 0.15–3.45  | 1.9:1 |
| hsa-miR-34a-5p    | OR | 0.72 | 0.15–3.42  | 1.9:1 |
| hsa-miR-380-5p    | OR | 1.49 | 0.18–11.07 | 1.9:1 |
| hsa-miR-1911-5p   | OR | 1.64 | 0.12–22.5  | 1.9:1 |
| hsa-miR-32-5p     | OR | 1.63 | 0.12–24.84 | 1.9:1 |
| hsa-let-7i-3p     | OR | 1.63 | 0.12–23.61 | 1.9:1 |

CI 95, 95% confidence intervals; POR, posterior odds ratio; FC, fold change; OR, odd ratio.

|                   |    |      |            |       |
|-------------------|----|------|------------|-------|
| hsa-miR-223-5p    | OR | 1.44 | 0.22–8.67  | 1.9:1 |
| hsa-miR-331-3p    | OR | 0.72 | 0.16–3.63  | 1.9:1 |
| hsa-miR-191-5p    | FC | 1.24 | 0.49–3.19  | 1.9:1 |
| hsa-miR-502-3p    | FC | 0.74 | 0.18–3.26  | 1.9:1 |
| hsa-miR-802       | OR | 1.66 | 0.12–23.47 | 1.9:1 |
| hsa-miR-524-5p    | FC | 0.76 | 0.19–3.04  | 1.9:1 |
| hsa-miR-421       | OR | 1.42 | 0.28–8.07  | 1.9:1 |
| hsa-miR-518d-5p   | OR | 1.46 | 0.18–11.17 | 1.9:1 |
| hsa-miR-26b-5p    | FC | 0.76 | 0.18–3.04  | 1.9:1 |
| hsa-miR-1296      | FC | 0.78 | 0.23–2.9   | 1.9:1 |
| hsa-miR-423-3p    | FC | 0.76 | 0.17–2.81  | 1.9:1 |
| hsa-miR-28-3p     | FC | 0.78 | 0.24–2.59  | 1.9:1 |
| hsa-miR-125b-2-3p | OR | 0.62 | 0.05–5.33  | 1.9:1 |
| hsa-miR-208a      | OR | 1.61 | 0.1–18.89  | 1.9:1 |
| hsa-miR-490-5p    | OR | 1.62 | 0.11–20.26 | 1.8:1 |
| hsa-miR-526b-5p   | OR | 1.59 | 0.14–25.98 | 1.8:1 |
| hsa-miR-554       | OR | 1.6  | 0.11–22.6  | 1.8:1 |
| hsa-miR-146b-5p   | OR | 0.74 | 0.15–3.73  | 1.8:1 |
| hsa-miR-631       | OR | 1.34 | 0.3–6.12   | 1.8:1 |
| hsa-miR-943       | OR | 0.73 | 0.16–3.6   | 1.8:1 |
| hsa-miR-449b-3p   | OR | 1.59 | 0.11–24.57 | 1.8:1 |
| hsa-miR-571       | FC | 0.8  | 0.27–2.67  | 1.8:1 |
| hsa-miR-548l      | OR | 1.62 | 0.13–25.74 | 1.8:1 |
| hsa-miR-30b-3p    | OR | 0.71 | 0.11–4.66  | 1.8:1 |
| hsa-miR-217       | OR | 1.45 | 0.18–10.24 | 1.8:1 |
| hsa-miR-509-3-5p  | OR | 1.56 | 0.1–22.13  | 1.8:1 |
| hsa-miR-224-5p    | OR | 1.45 | 0.18–11.94 | 1.8:1 |
| hsa-miR-766-3p    | OR | 0.75 | 0.16–3.59  | 1.8:1 |
| hsa-miR-29b-2-5p  | OR | 1.33 | 0.27–6.87  | 1.8:1 |
| hsa-miR-34c-3p    | OR | 0.71 | 0.11–4.23  | 1.8:1 |
| hsa-miR-342-3p    | FC | 1.26 | 0.38–4.74  | 1.7:1 |
| hsa-miR-501-5p    | FC | 0.79 | 0.16–2.99  | 1.7:1 |
| hsa-miR-25-3p     | FC | 1.23 | 0.33–4.27  | 1.7:1 |
| hsa-miR-937       | FC | 1.22 | 0.36–3.94  | 1.7:1 |
| hsa-miR-362-5p    | FC | 0.82 | 0.25–2.83  | 1.7:1 |
| hsa-miR-216a      | OR | 0.72 | 0.11–4.56  | 1.7:1 |
| hsa-miR-1224-3p   | FC | 1.27 | 0.28–5.58  | 1.7:1 |
| hsa-miR-92b-3p    | OR | 1.27 | 0.27–5.95  | 1.7:1 |
| hsa-miR-551a      | OR | 0.77 | 0.16–3.89  | 1.7:1 |
| hsa-miR-218-1-3p  | FC | 1.2  | 0.39–3.91  | 1.7:1 |
| hsa-miR-142-3p    | FC | 1.23 | 0.31–4.93  | 1.6:1 |
| hsa-miR-1539      | FC | 1.21 | 0.34–4.68  | 1.6:1 |
| hsa-miR-596       | OR | 0.77 | 0.12–4.79  | 1.6:1 |
| hsa-miR-324-3p    | FC | 0.85 | 0.28–2.71  | 1.6:1 |
| hsa-miR-181d      | OR | 0.76 | 0.15–3.88  | 1.6:1 |
| hsa-miR-98        | OR | 0.76 | 0.11–5.15  | 1.5:1 |
| hsa-miR-342-5p    | OR | 0.78 | 0.12–3.66  | 1.5:1 |
| hsa-miR-190a      | OR | 0.75 | 0.1–4.88   | 1.5:1 |
| hsa-miR-643       | OR | 0.8  | 0.15–4.43  | 1.5:1 |
| hsa-miR-151a-3p   | FC | 0.84 | 0.26–2.99  | 1.5:1 |

CI 95, 95% confidence intervals; POR, posterior odds ratio; FC, fold change; OR, odd ratio.

|                 |    |      |           |       |
|-----------------|----|------|-----------|-------|
| hsa-miR-589-5p  | OR | 1.2  | 0.25–5.94 | 1.5:1 |
| hsa-miR-485-3p  | FC | 0.88 | 0.28–2.65 | 1.5:1 |
| hsa-miR-29c-3p  | FC | 1.17 | 0.3–4.73  | 1.4:1 |
| hsa-miR-148b-3p | OR | 0.82 | 0.16–4.27 | 1.4:1 |
| hsa-miR-320b    | FC | 0.87 | 0.26–2.7  | 1.4:1 |
| hsa-miR-888-5p  | FC | 1.14 | 0.36–3.86 | 1.4:1 |
| hsa-miR-496     | FC | 1.16 | 0.28–4.72 | 1.4:1 |
| hsa-miR-196a-5p | FC | 0.87 | 0.23–3.59 | 1.4:1 |
| hsa-miR-629-3p  | FC | 0.86 | 0.22–3.33 | 1.4:1 |
| hsa-miR-215     | FC | 1.18 | 0.3–4.21  | 1.4:1 |
| hsa-miR-143-5p  | OR | 1.2  | 0.22–7.37 | 1.4:1 |
| hsa-miR-107     | FC | 0.85 | 0.2–3.38  | 1.4:1 |
| hsa-miR-624-5p  | OR | 0.83 | 0.15–4.53 | 1.4:1 |
| hsa-miR-551b-5p | OR | 1.18 | 0.19–8.01 | 1.4:1 |
| hsa-miR-548k    | OR | 1.17 | 0.23–5.35 | 1.4:1 |
| hsa-miR-584-5p  | FC | 1.15 | 0.28–4.73 | 1.4:1 |
| hsa-miR-517-5p  | OR | 0.81 | 0.12–6.49 | 1.4:1 |
| hsa-miR-576-5p  | OR | 0.78 | 0.07–7.58 | 1.4:1 |
| hsa-miR-30d-3p  | FC | 0.9  | 0.25–2.99 | 1.3:1 |
| hsa-miR-493-3p  | OR | 0.84 | 0.15–4.34 | 1.3:1 |
| hsa-miR-1244    | FC | 0.88 | 0.24–3.08 | 1.3:1 |
| hsa-miR-181c-5p | OR | 0.82 | 0.12–6.54 | 1.3:1 |
| hsa-miR-182-5p  | FC | 1.14 | 0.25–5.01 | 1.3:1 |
| hsa-let-7f-2-3p | OR | 0.79 | 0.07–6.74 | 1.3:1 |
| hsa-miR-29a-3p  | FC | 1.14 | 0.28–4.72 | 1.3:1 |
| hsa-miR-374a-5p | OR | 1.18 | 0.18–7.16 | 1.3:1 |
| hsa-miR-760     | FC | 0.9  | 0.26–2.93 | 1.3:1 |
| hsa-miR-197-3p  | FC | 0.89 | 0.25–3.4  | 1.3:1 |
| hsa-miR-450a-5p | OR | 1.14 | 0.22–5.48 | 1.3:1 |
| hsa-miR-518c-5p | OR | 1.16 | 0.16–7.85 | 1.3:1 |
| hsa-miR-31-3p   | OR | 1.14 | 0.21–6.6  | 1.3:1 |
| hsa-miR-99b-5p  | FC | 1.09 | 0.3–3.79  | 1.3:1 |
| hsa-miR-365a-5p | OR | 0.8  | 0.08–8.19 | 1.3:1 |
| hsa-miR-187-5p  | OR | 0.8  | 0.08–8.62 | 1.3:1 |
| hsa-miR-155-5p  | OR | 1.14 | 0.19–5.89 | 1.3:1 |
| hsa-miR-15b-5p  | FC | 0.9  | 0.22–3.82 | 1.3:1 |
| hsa-let-7e-5p   | FC | 0.9  | 0.23–3.4  | 1.3:1 |
| hsa-miR-628-5p  | FC | 0.91 | 0.29–2.95 | 1.3:1 |
| hsa-miR-412     | OR | 1.13 | 0.2–6.4   | 1.3:1 |
| hsa-miR-17-3p   | OR | 0.82 | 0.07–7.68 | 1.3:1 |
| hsa-miR-486-3p  | OR | 0.88 | 0.17–3.85 | 1.3:1 |
| hsa-miR-611     | OR | 0.88 | 0.19–4.23 | 1.3:1 |
| hsa-miR-653     | OR | 1.14 | 0.2–6.16  | 1.3:1 |
| hsa-miR-33a-3p  | OR | 1.12 | 0.2–6.08  | 1.3:1 |
| hsa-miR-497-5p  | OR | 1.12 | 0.24–5.93 | 1.3:1 |
| hsa-miR-195-5p  | OR | 1.13 | 0.2–5.9   | 1.3:1 |
| hsa-miR-595     | FC | 0.93 | 0.29–3.05 | 1.3:1 |
| hsa-miR-502-5p  | FC | 0.91 | 0.3–3.04  | 1.3:1 |
| hsa-miR-433     | FC | 1.09 | 0.31–4.18 | 1.3:1 |
| hsa-miR-431-5p  | OR | 1.12 | 0.2–5.91  | 1.3:1 |

CI 95, 95% confidence intervals; POR, posterior odds ratio; FC, fold change; OR, odd ratio.

|                  |    |      |            |       |
|------------------|----|------|------------|-------|
| hsa-miR-1471     | FC | 1.08 | 0.35–3.36  | 1.2:1 |
| hsa-miR-573      | OR | 0.8  | 0.07–7.52  | 1.2:1 |
| hsa-miR-200b-3p  | FC | 0.93 | 0.29–3.05  | 1.2:1 |
| hsa-miR-708-3p   | FC | 0.9  | 0.24–3.53  | 1.2:1 |
| hsa-miR-7-5p     | OR | 1.11 | 0.22–5.41  | 1.2:1 |
| hsa-miR-891a     | OR | 1.13 | 0.16–7.4   | 1.2:1 |
| hsa-miR-346      | FC | 1.08 | 0.34–3.47  | 1.2:1 |
| hsa-miR-1205     | OR | 1.1  | 0.2–5.04   | 1.2:1 |
| hsa-miR-193b-3p  | FC | 1.11 | 0.25–4.23  | 1.2:1 |
| hsa-miR-1208     | OR | 1.11 | 0.2–8      | 1.2:1 |
| hsa-miR-338-3p   | OR | 1.11 | 0.16–6.91  | 1.2:1 |
| hsa-miR-1909-3p  | FC | 1.07 | 0.32–3.29  | 1.2:1 |
| hsa-miR-431-3p   | OR | 1.08 | 0.23–5.56  | 1.2:1 |
| hsa-miR-33a-5p   | FC | 1.07 | 0.34–3.51  | 1.2:1 |
| hsa-miR-214-3p   | FC | 1.09 | 0.29–4.57  | 1.2:1 |
| hsa-miR-877-5p   | OR | 0.91 | 0.19–4.46  | 1.2:1 |
| hsa-miR-194-5p   | FC | 0.94 | 0.28–3.33  | 1.2:1 |
| hsa-miR-371a-5p  | OR | 1.11 | 0.16–6.99  | 1.2:1 |
| hsa-miR-374b-5p  | FC | 1.08 | 0.28–4.47  | 1.2:1 |
| hsa-miR-1249     | OR | 1.09 | 0.16–6.57  | 1.2:1 |
| hsa-miR-552      | FC | 0.94 | 0.22–3.94  | 1.2:1 |
| hsa-miR-566      | OR | 1.08 | 0.23–5.53  | 1.2:1 |
| hsa-miR-632      | FC | 0.95 | 0.29–2.78  | 1.1:1 |
| hsa-miR-196b-5p  | OR | 1.05 | 0.22–4.94  | 1.1:1 |
| hsa-miR-383      | OR | 0.89 | 0.08–9.38  | 1.1:1 |
| hsa-miR-130a-3p  | OR | 0.92 | 0.18–4.56  | 1.1:1 |
| hsa-miR-708-5p   | OR | 1.06 | 0.18–5.87  | 1.1:1 |
| hsa-miR-576-3p   | OR | 0.9  | 0.09–9.13  | 1.1:1 |
| hsa-miR-934      | FC | 0.96 | 0.3–3.2    | 1.1:1 |
| hsa-miR-525-5p   | OR | 0.9  | 0.09–9.83  | 1.1:1 |
| hsa-miR-651      | OR | 1.02 | 0.1–11.01  | 1.1:1 |
| hsa-miR-582-3p   | OR | 1.04 | 0.2–5.03   | 1.1:1 |
| hsa-miR-125a-3p  | OR | 0.91 | 0.08–9.14  | 1.1:1 |
| hsa-miR-146a-5p  | FC | 1.04 | 0.22–4.49  | 1.1:1 |
| hsa-miR-181a-3p  | OR | 0.92 | 0.09–9.54  | 1.1:1 |
| hsa-miR-504      | OR | 1.01 | 0.1–9.83   | 1.1:1 |
| hsa-miR-668      | OR | 0.9  | 0.08–8.15  | 1.1:1 |
| hsa-miR-520f     | OR | 1.02 | 0.09–10.17 | 1.1:1 |
| hsa-miR-922      | OR | 0.92 | 0.1–9.49   | 1.1:1 |
| hsa-miR-338-5p   | OR | 0.93 | 0.09–9.42  | 1.1:1 |
| hsa-miR-128      | OR | 1.01 | 0.1–10.51  | 1.1:1 |
| hsa-miR-92a-1-5p | OR | 0.92 | 0.1–10.17  | 1.1:1 |
| hsa-miR-106a-3p  | OR | 1.01 | 0.09–10.11 | 1.1:1 |
| hsa-miR-432-5p   | OR | 0.99 | 0.1–11.2   | 1.1:1 |
| hsa-miR-940      | FC | 0.98 | 0.3–3.39   | 1.1:1 |
| hsa-miR-24-1-5p  | OR | 0.91 | 0.09–8.99  | 1.1:1 |
| hsa-miR-493-5p   | OR | 0.92 | 0.08–8.4   | 1.1:1 |
| hsa-miR-92a-2-5p | OR | 0.92 | 0.1–10.17  | 1.1:1 |
| hsa-miR-488-5p   | OR | 1.01 | 0.1–10.12  | 1.1:1 |
| hsa-miR-499a-5p  | OR | 0.9  | 0.09–8.43  | 1.1:1 |

CI 95, 95% confidence intervals; POR, posterior odds ratio; FC, fold change; OR, odd ratio.

|                 |    |      |           |       |
|-----------------|----|------|-----------|-------|
| hsa-miR-206     | OR | 1.01 | 0.1–10.59 | 1.1:1 |
| hsa-miR-454-3p  | OR | 1.02 | 0.21–5.2  | 1.1:1 |
| hsa-miR-661     | OR | 1.04 | 0.18–5.94 | 1.1:1 |
| hsa-miR-451a    | OR | 0.96 | 0.19–4.56 | 1.1:1 |
| hsa-miR-671-3p  | OR | 0.93 | 0.08–8.73 | 1.1:1 |
| hsa-miR-18a-3p  | OR | 0.92 | 0.1–9.76  | 1.1:1 |
| hsa-miR-875-3p  | OR | 0.94 | 0.09–8.72 | 1.1:1 |
| hsa-miR-1258    | OR | 0.93 | 0.09–9.19 | 1:01  |
| hsa-miR-101-5p  | OR | 0.99 | 0.1–10.91 | 1:01  |
| hsa-miR-150-5p  | FC | 0.97 | 0.2–4.74  | 1:01  |
| hsa-miR-619     | OR | 1.02 | 0.24–4.83 | 1:01  |
| hsa-miR-153     | OR | 1    | 0.1–11.13 | 1:01  |
| hsa-miR-378a-3p | FC | 0.98 | 0.29–3.4  | 1:01  |
| hsa-miR-125a-5p | FC | 0.99 | 0.29–3.6  | 1:01  |
| hsa-miR-16-2-3p | OR | 0.93 | 0.11–9.81 | 1:01  |
| hsa-miR-609     | OR | 0.95 | 0.09–8.86 | 1:01  |
| hsa-miR-508-5p  | OR | 0.93 | 0.09–9.93 | 1:01  |
| hsa-miR-671-5p  | FC | 1    | 0.3–3.3   | 1:01  |
| hsa-miR-129-5p  | OR | 0.95 | 0.09–8.84 | 1:01  |
| hsa-miR-509-3p  | FC | 1.01 | 0.32–3.41 | 1:01  |
| hsa-miR-520h    | FC | 1.01 | 0.27–3.93 | 1:01  |
| hsa-miR-621     | OR | 1    | 0.15–6.1  | 1:01  |
| hsa-miR-202-3p  | OR | 0.98 | 0.14–6.43 | 1:01  |
| hsa-miR-513c-5p | OR | 0.95 | 0.08–8.28 | 1:01  |
| hsa-miR-1272    | OR | 0.99 | 0.14–6.29 | 1:01  |
