# Supplementary material for: Urinary MicroRNA Profiling Predicts the Development of Microalbuminuria in Patients with Type 1 Diabetes
Source: PubMed Central journal article supplement (PMC4519802; doi:10.3390/jcm4071498), 2015-07-17
Supplement: jcm-04-01498-s002.pdf [file jcm-04-01498-s002.pdf]

**Supplementary Table S2**

| <b>MiRBase_ID</b> | <b>Effect</b> | <b>Size</b> | <b>CI 95</b>   | <b>POR</b> |
|-------------------|---------------|-------------|----------------|------------|
| hsa-miR-1247-5p   | FC            | 12.39       | 4.34–37.14     | 11,999:1   |
| hsa-miR-495       | FC            | 56.07       | 17.41–162.69   | 11,999:1   |
| hsa-miR-548o-3p   | FC            | 11.5        | 3.04–42.64     | 11,999:1   |
| hsa-miR-624-5p    | OR            | 25.32       | 3.67–223.04    | 11,999:1   |
| hsa-miR-767-3p    | OR            | 357.33      | 5.39–29,304.54 | 5999:01:00 |
| hsa-miR-373-5p    | FC            | 0.13        | 0.04–0.41      | 5999:01:00 |
| hsa-miR-223-3p    | FC            | 8.44        | 2.16–28.04     | 2999:01:00 |
| hsa-miR-920       | OR            | 26.12       | 2.24–381.63    | 1499:01:00 |
| hsa-miR-21-5p     | FC            | 5.66        | 1.95–17.32     | 999:01:00  |
| hsa-miR-203       | FC            | 6.55        | 1.97–20.9      | 749:01:00  |
| hsa-miR-577       | FC            | 5.58        | 1.87–18.1      | 665.7:1    |
| hsa-miR-378a-3p   | FC            | 0.19        | 0.05–0.61      | 271.7:1    |
| hsa-miR-19b-3p    | FC            | 0.1         | 0.02–0.52      | 221.2:1    |
| hsa-miR-23a-3p    | FC            | 4.45        | 1.38–13.8      | 180.8:1    |
| hsa-miR-154-3p    | OR            | 0.01        | 0–1.02         | 156.9:1    |
| hsa-miR-186-5p    | FC            | 0.21        | 0.06–0.75      | 145.3:1    |
| hsa-miR-374a-5p   | OR            | 0.01        | 0–0.93         | 138.5:1    |
| hsa-miR-551b-5p   | OR            | 0.01        | 0–1.08         | 135.4:1    |
| hsa-miR-363-3p    | OR            | 0.08        | 0.01–0.81      | 121.4:1    |
| hsa-miR-517-5p    | OR            | 13.94       | 1.28–241.78    | 104.3:1    |
| hsa-miR-181c-5p   | OR            | 13.99       | 1.11–216.03    | 95.8:1     |
| hsa-miR-608       | OR            | 6.29        | 1.27–34.74     | 95.8:1     |
| hsa-miR-940       | FC            | 0.26        | 0.08–0.83      | 94.2:1     |
| hsa-miR-493-3p    | OR            | 0.12        | 0.02–0.94      | 91.3:1     |
| hsa-miR-376a-3p   | OR            | 7.68        | 1.15–61.24     | 77.9:1     |
| hsa-miR-205-5p    | FC            | 3.87        | 1.23–13.55     | 71.3:1     |
| hsa-miR-1908      | OR            | 10.47       | 1.18–152.83    | 64.2:1     |
| hsa-miR-190a      | OR            | 0.02        | 0–1.49         | 62.2:1     |
| hsa-miR-17-5p     | FC            | 4.43        | 1.05–17.23     | 58.4:1     |
| hsa-miR-98        | OR            | 0.02        | 0–1.61         | 56.1:1     |
| hsa-miR-567       | OR            | 15.15       | 1.05–355.07    | 51.2:1     |
| hsa-miR-127-3p    | OR            | 15.4        | 0.92–329.11    | 49:01:00   |
| hsa-miR-570-3p    | OR            | 8.18        | 0.93–88.85     | 44.8:1     |
| hsa-miR-424-5p    | FC            | 0.23        | 0.05–0.89      | 43.1:1     |
| hsa-miR-29b-2-5p  | OR            | 0.18        | 0.03–1.06      | 42.5:1     |
| hsa-miR-1260a     | FC            | 0.32        | 0.11–0.99      | 41.9:1     |
| hsa-miR-765       | FC            | 3.02        | 1.01–9.74      | 38.5:1     |
| hsa-miR-550a-5p   | OR            | 4.58        | 0.94–22.19     | 38.2:1     |
| hsa-miR-888-5p    | FC            | 0.33        | 0.11–0.98      | 36.7:1     |
| hsa-miR-340-3p    | OR            | 6.43        | 0.94–63.38     | 35.1:1     |
| hsa-miR-1914-3p   | OR            | 0.03        | 0–1.75         | 34.7:1     |
| hsa-miR-200a-5p   | OR            | 5.65        | 0.95–41.41     | 34.7:1     |
| hsa-miR-7-2-3p    | OR            | 6.37        | 0.83–51.57     | 33.9:1     |
| hsa-miR-518e-5p   | OR            | 5.39        | 0.74–30.93     | 32.1:1     |
| hsa-miR-33b-3p    | OR            | 5.48        | 0.95–41.99     | 32:01:00   |
| hsa-miR-431-5p    | OR            | 0.15        | 0.01–1.22      | 31.1:1     |
| hsa-miR-302d-3p   | OR            | 9.37        | 0.71–144.21    | 30.9:1     |

CI 95, 95% confidence intervals; POR, posterior odds ratio; FC, fold change; OR, odd ratio.

|                   |    |      |             |          |
|-------------------|----|------|-------------|----------|
| hsa-miR-499a-3p   | OR | 6.42 | 0.78–51.79  | 30.7:1   |
| hsa-miR-524-5p    | FC | 3.35 | 0.94–12.67  | 29.6:1   |
| hsa-miR-452-3p    | OR | 5.42 | 0.88–48.27  | 28:01:00 |
| hsa-miR-518d-5p   | OR | 7.41 | 0.7–97.39   | 27.2:1   |
| hsa-miR-421       | OR | 4.79 | 0.88–33.22  | 26:01:00 |
| hsa-miR-548c-5p   | OR | 4.31 | 0.81–21.81  | 25.7:1   |
| hsa-miR-223-5p    | OR | 5.42 | 0.83–47.94  | 24.9:1   |
| hsa-miR-224-5p    | OR | 7.05 | 0.63–76.7   | 24.8:1   |
| hsa-miR-217       | OR | 7.37 | 0.7–107.11  | 24.6:1   |
| hsa-miR-380-5p    | OR | 7.18 | 0.66–85.54  | 24.3:1   |
| hsa-miR-548c-3p   | OR | 6.3  | 0.65–62.6   | 24.3:1   |
| hsa-miR-30e-5p    | FC | 3.59 | 0.87–15.65  | 24:01:00 |
| hsa-miR-144-3p    | OR | 0.04 | 0–2.37      | 23.6:1   |
| hsa-miR-379-3p    | OR | 0.04 | 0–2.24      | 21.3:1   |
| hsa-miR-520h      | FC | 0.36 | 0.11–1.23   | 18.7:1   |
| hsa-miR-410       | OR | 0.04 | 0–2.58      | 18.7:1   |
| hsa-miR-450b-3p   | FC | 2.59 | 0.87–8.01   | 18.6:1   |
| hsa-miR-545-3p    | OR | 0.24 | 0.04–1.51   | 18.5:1   |
| hsa-miR-486-3p    | OR | 3.54 | 0.75–18.42  | 18:01    |
| hsa-miR-491-5p    | OR | 3.72 | 0.68–19.51  | 17.1:1   |
| hsa-miR-505-5p    | FC | 0.33 | 0.09–1.38   | 16.7:1   |
| hsa-miR-505-3p    | FC | 0.31 | 0.07–1.33   | 16.6:1   |
| hsa-miR-611       | OR | 3.5  | 0.7–17.28   | 16.4:1   |
| hsa-miR-382-5p    | OR | 0.05 | 0–2.7       | 16.3:1   |
| hsa-miR-543       | FC | 0.41 | 0.14–1.35   | 16.2:1   |
| hsa-miR-451a      | OR | 3.41 | 0.66–17.81  | 15:01    |
| hsa-miR-485-3p    | FC | 0.44 | 0.15–1.24   | 14.8:1   |
| hsa-miR-135b-5p   | OR | 3.27 | 0.7–15.58   | 14.5:1   |
| hsa-miR-1914-5p   | OR | 3.73 | 0.66–21.85  | 13.6:1   |
| hsa-miR-454-3p    | OR | 3.36 | 0.64–17.47  | 13.5:1   |
| hsa-miR-195-3p    | OR | 3.12 | 0.7–14.54   | 13.4:1   |
| hsa-miR-320a      | FC | 2.27 | 0.77–6.71   | 13.3:1   |
| hsa-miR-125b-2-3p | OR | 0.05 | 0–3.16      | 13.1:1   |
| hsa-miR-616-3p    | OR | 4.41 | 0.54–45.14  | 13:01    |
| hsa-miR-130a-3p   | OR | 0.3  | 0.05–1.48   | 13:01    |
| hsa-miR-299-5p    | OR | 3.94 | 0.53–25.04  | 12.9:1   |
| hsa-miR-612       | OR | 3.93 | 0.58–26.35  | 12.9:1   |
| hsa-miR-370       | OR | 4.45 | 0.62–45.56  | 12.7:1   |
| hsa-miR-582-3p    | OR | 3.38 | 0.62–19.12  | 12.7:1   |
| hsa-miR-502-3p    | FC | 0.34 | 0.08–1.49   | 12.5:1   |
| hsa-miR-296-3p    | OR | 4.45 | 0.61–45.03  | 12.4:1   |
| hsa-miR-1909-3p   | FC | 0.46 | 0.16–1.31   | 12.1:1   |
| hsa-miR-661       | OR | 3.47 | 0.61–22.9   | 11.9:1   |
| hsa-miR-199b-5p   | OR | 6.06 | 0.43–109.55 | 11.6:1   |
| hsa-miR-302c-5p   | OR | 0.23 | 0.02–2.1    | 11.4:1   |
| hsa-miR-133a      | OR | 4.31 | 0.6–47.34   | 11.3:1   |
| hsa-miR-141-3p    | FC | 0.42 | 0.12–1.47   | 11:01    |
| hsa-let-7e-5p     | FC | 0.4  | 0.1–1.41    | 10.8:1   |
| hsa-miR-1468      | FC | 0.36 | 0.08–1.49   | 10.7:1   |
| hsa-miR-630       | OR | 5.8  | 0.44–100.24 | 10.7:1   |

CI 95, 95% confidence intervals; POR, posterior odds ratio; FC, fold change; OR, odd ratio.

|                  |    |      |            |        |
|------------------|----|------|------------|--------|
| hsa-miR-708-5p   | OR | 3.4  | 0.55–20.93 | 10.7:1 |
| hsa-miR-29c-3p   | FC | 0.39 | 0.1–1.46   | 10.6:1 |
| hsa-miR-885-3p   | FC | 0.49 | 0.18–1.48  | 10.5:1 |
| hsa-miR-9-3p     | OR | 3.14 | 0.54–17.54 | 10.5:1 |
| hsa-miR-197-3p   | FC | 0.43 | 0.12–1.39  | 10.5:1 |
| hsa-miR-24-2-5p  | OR | 0.32 | 0.05–1.69  | 10.5:1 |
| hsa-miR-551b-3p  | OR | 0.06 | 0–3.24     | 10.4:1 |
| hsa-miR-1182     | OR | 5.75 | 0.4–96.24  | 10.1:1 |
| hsa-miR-621      | OR | 3.67 | 0.55–32.17 | 10.1:1 |
| hsa-miR-202-3p   | OR | 3.63 | 0.52–26.81 | 10.1:1 |
| hsa-miR-1272     | OR | 3.68 | 0.52–27.06 | 10.1:1 |
| hsa-miR-511      | OR | 0.06 | 0–4.08     | 10:01  |
| hsa-miR-1271-5p  | OR | 0.06 | 0–3.67     | 10:01  |
| hsa-miR-409-3p   | OR | 0.32 | 0.06–1.83  | 9.9:1  |
| hsa-miR-639      | FC | 0.48 | 0.16–1.38  | 9.9:1  |
| hsa-miR-1972     | FC | 0.41 | 0.1–1.49   | 9.8:1  |
| hsa-miR-1255b-5p | OR | 3.16 | 0.55–18.52 | 9.7:1  |
| hsa-miR-132-5p   | OR | 2.92 | 0.63–15.42 | 9.7:1  |
| hsa-miR-34b-5p   | OR | 0.31 | 0.05–1.81  | 9.6:1  |
| hsa-miR-154-5p   | OR | 0.07 | 0–3.87     | 9.5:1  |
| hsa-miR-128      | OR | 0.07 | 0–3.95     | 9.3:1  |
| hsa-miR-26b-3p   | OR | 0.06 | 0–3.96     | 9.3:1  |
| hsa-miR-329      | FC | 2.1  | 0.75–6.89  | 9.2:1  |
| hsa-miR-605      | FC | 0.49 | 0.17–1.44  | 9.2:1  |
| hsa-miR-519e-5p  | OR | 0.06 | 0–4.59     | 9.2:1  |
| hsa-miR-432-5p   | OR | 0.07 | 0–4.01     | 9.2:1  |
| hsa-miR-488-5p   | OR | 0.07 | 0–3.94     | 9.1:1  |
| hsa-miR-15b-5p   | FC | 2.44 | 0.62–8.93  | 9:01   |
| hsa-let-7f-2-3p  | OR | 4.43 | 0.36–60.09 | 8.9:1  |
| hsa-miR-1256     | OR | 3.3  | 0.52–25.11 | 8.9:1  |
| hsa-miR-504      | OR | 0.07 | 0–4.21     | 8.8:1  |
| hsa-miR-520f     | OR | 0.07 | 0–4.26     | 8.8:1  |
| hsa-miR-206      | OR | 0.07 | 0–4.04     | 8.8:1  |
| hsa-miR-483-3p   | OR | 0.36 | 0.07–1.78  | 8.8:1  |
| hsa-miR-651      | OR | 0.07 | 0–4.38     | 8.7:1  |
| hsa-miR-106a-3p  | OR | 0.07 | 0–5.03     | 8.6:1  |
| hsa-miR-153      | OR | 0.07 | 0–3.62     | 8.6:1  |
| hsa-miR-936      | OR | 2.68 | 0.55–13.11 | 8.4:1  |
| hsa-miR-182-5p   | FC | 0.4  | 0.08–1.52  | 8.4:1  |
| hsa-miR-198      | OR | 3.24 | 0.46–22.12 | 8.3:1  |
| hsa-miR-101-5p   | OR | 0.07 | 0–4.11     | 8.3:1  |
| hsa-miR-573      | OR | 4.49 | 0.4–70.04  | 8.3:1  |
| hsa-miR-20a-3p   | OR | 0.07 | 0–4.05     | 8.2:1  |
| hsa-miR-17-3p    | OR | 4.45 | 0.33–56.31 | 8.2:1  |
| hsa-miR-576-5p   | OR | 4.52 | 0.38–65.48 | 8.2:1  |
| hsa-miR-616-5p   | OR | 2.75 | 0.58–16.21 | 8.1:1  |
| hsa-miR-187-5p   | OR | 4.44 | 0.46–69.52 | 8.1:1  |
| hsa-miR-1538     | FC | 0.4  | 0.09–1.79  | 8:01   |
| hsa-miR-211-5p   | OR | 3.23 | 0.47–22.48 | 8:01   |
| hsa-miR-330-3p   | OR | 0.07 | 0–3.38     | 7.9:1  |

CI 95, 95% confidence intervals; POR, posterior odds ratio; FC, fold change; OR, odd ratio.

|                  |    |      |            |       |
|------------------|----|------|------------|-------|
| hsa-miR-365a-5p  | OR | 4.56 | 0.37–67.76 | 7.8:1 |
| hsa-miR-758      | OR | 0.08 | 0–4.64     | 7.8:1 |
| hsa-miR-455-3p   | OR | 2.47 | 0.53–10.67 | 7.8:1 |
| hsa-miR-15b-3p   | OR | 0.08 | 0–3.7      | 7.8:1 |
| hsa-miR-602      | FC | 2.11 | 0.62–7.07  | 7.7:1 |
| hsa-miR-1207-5p  | FC | 0.52 | 0.18–1.54  | 7.5:1 |
| hsa-miR-362-5p   | FC | 0.5  | 0.16–1.61  | 7.5:1 |
| hsa-miR-133b     | OR | 0.08 | 0–4.65     | 7.5:1 |
| hsa-miR-16-5p    | FC | 2.03 | 0.65–6.81  | 7.4:1 |
| hsa-miR-770-5p   | OR | 0.28 | 0.03–2.3   | 7.4:1 |
| hsa-miR-637      | OR | 0.08 | 0–4.62     | 7.4:1 |
| hsa-miR-19b-2-5p | OR | 2.48 | 0.59–12.22 | 7.4:1 |
| hsa-miR-454-5p   | OR | 2.56 | 0.54–13.02 | 7.4:1 |
| hsa-miR-18a-5p   | OR | 0.38 | 0.07–2     | 7.3:1 |
| hsa-miR-892a     | OR | 0.07 | 0–4.98     | 7.2:1 |
| hsa-miR-92b-3p   | OR | 2.47 | 0.54–12.36 | 7.2:1 |
| hsa-miR-1181     | OR | 2.37 | 0.52–10.6  | 6.9:1 |
| hsa-miR-146b-5p  | OR | 2.5  | 0.52–13.16 | 6.8:1 |
| hsa-miR-486-5p   | OR | 2.36 | 0.56–11.59 | 6.8:1 |
| hsa-miR-300      | FC | 2.18 | 0.53–8.22  | 6.8:1 |
| hsa-miR-219-1-3p | OR | 3.65 | 0.3–42.15  | 6.8:1 |
| hsa-miR-7-1-3p   | OR | 2.38 | 0.55–11.52 | 6.7:1 |
| hsa-miR-572      | FC | 1.83 | 0.65–5.69  | 6.6:1 |
| hsa-miR-518f-5p  | FC | 0.43 | 0.1–1.93   | 6.6:1 |
| hsa-miR-130b-5p  | OR | 3.62 | 0.34–46.48 | 6.6:1 |
| hsa-miR-10b-5p   | FC | 1.9  | 0.61–5.85  | 6.6:1 |
| hsa-miR-1912     | OR | 2.69 | 0.46–16.74 | 6.5:1 |
| hsa-miR-943      | OR | 2.51 | 0.5–13.72  | 6.4:1 |
| hsa-miR-665      | FC | 2.08 | 0.56–7.7   | 6.4:1 |
| hsa-miR-548i     | OR | 3.61 | 0.31–42.96 | 6.4:1 |
| hsa-miR-302d-5p  | OR | 0.42 | 0.08–2.05  | 6.2:1 |
| hsa-miR-1270     | OR | 3.6  | 0.33–43.69 | 6.1:1 |
| hsa-miR-548k     | OR | 0.44 | 0.09–2.25  | 5.8:1 |
| hsa-miR-27b-3p   | FC | 1.84 | 0.55–5.7   | 5.8:1 |
| hsa-miR-342-5p   | OR | 2.44 | 0.45–14.32 | 5.8:1 |
| hsa-miR-181d     | OR | 2.46 | 0.46–13.19 | 5.7:1 |
| hsa-miR-571      | FC | 0.57 | 0.2–1.73   | 5.7:1 |
| hsa-miR-589-5p   | OR | 0.44 | 0.09–2.11  | 5.7:1 |
| hsa-miR-122-5p   | FC | 0.54 | 0.18–1.88  | 5.7:1 |
| hsa-miR-188-3p   | FC | 1.75 | 0.61–5     | 5.7:1 |
| hsa-miR-629-5p   | OR | 2.26 | 0.46–10.85 | 5.7:1 |
| hsa-miR-139-5p   | FC | 1.88 | 0.58–6.03  | 5.6:1 |
| hsa-miR-650      | FC | 0.57 | 0.19–1.67  | 5.6:1 |
| hsa-miR-23b-5p   | OR | 0.11 | 0–6.84     | 5.4:1 |
| hsa-miR-593-5p   | OR | 2.66 | 0.39–16.98 | 5.4:1 |
| hsa-miR-542-5p   | OR | 2.28 | 0.42–10.65 | 5.4:1 |
| hsa-miR-2113     | OR | 2.74 | 0.35–17.78 | 5.4:1 |
| hsa-miR-934      | FC | 1.71 | 0.58–4.92  | 5.4:1 |
| hsa-miR-22-3p    | FC | 0.52 | 0.14–1.93  | 5.3:1 |
| hsa-miR-20b-5p   | OR | 0.4  | 0.06–2.4   | 5.3:1 |

CI 95, 95% confidence intervals; POR, posterior odds ratio; FC, fold change; OR, odd ratio.

|                 |    |      |            |       |
|-----------------|----|------|------------|-------|
| hsa-miR-552     | FC | 2.14 | 0.47–8.91  | 5.3:1 |
| hsa-miR-492     | OR | 0.11 | 0–7.58     | 5.2:1 |
| hsa-miR-663a    | FC | 0.57 | 0.19–1.72  | 5.2:1 |
| hsa-miR-589-3p  | OR | 0.11 | 0–6.46     | 5.2:1 |
| hsa-let-7b-3p   | OR | 2.16 | 0.42–9.68  | 5.1:1 |
| hsa-miR-1       | OR | 0.36 | 0.04–2.81  | 5.1:1 |
| hsa-miR-512-3p  | OR | 0.35 | 0.04–3.14  | 5.1:1 |
| hsa-miR-1224-3p | FC | 0.43 | 0.07–2.12  | 5.1:1 |
| hsa-miR-425-3p  | OR | 0.41 | 0.06–2.4   | 5.1:1 |
| hsa-miR-548a-5p | OR | 0.12 | 0–8.89     | 5.1:1 |
| hsa-miR-376b    | OR | 0.11 | 0–4.89     | 5:01  |
| hsa-miR-518d-3p | OR | 0.11 | 0–6.62     | 5:01  |
| hsa-miR-127-5p  | OR | 0.11 | 0–7.68     | 5:01  |
| hsa-miR-508-3p  | OR | 0.12 | 0–6.23     | 5:01  |
| hsa-miR-515-5p  | OR | 0.11 | 0–8.73     | 5:01  |
| hsa-miR-516a-5p | OR | 0.12 | 0–7.7      | 5:01  |
| hsa-miR-597     | OR | 0.12 | 0–7.08     | 5:01  |
| hsa-miR-649     | OR | 0.11 | 0–8.01     | 5:01  |
| hsa-miR-199a-3p | OR | 0.12 | 0–6.51     | 5:01  |
| hsa-miR-769-5p  | OR | 0.11 | 0–6.29     | 5:01  |
| hsa-miR-301b    | OR | 0.11 | 0–7.65     | 4.9:1 |
| hsa-miR-539-5p  | OR | 0.35 | 0.04–3.24  | 4.9:1 |
| hsa-miR-30b-3p  | OR | 2.42 | 0.38–14.45 | 4.9:1 |
| hsa-miR-1267    | OR | 0.11 | 0–5.61     | 4.9:1 |
| hsa-miR-583     | OR | 0.11 | 0–6.88     | 4.9:1 |
| hsa-miR-379-5p  | OR | 0.12 | 0–5.12     | 4.9:1 |
| hsa-miR-885-5p  | OR | 0.12 | 0–5.7      | 4.8:1 |
| hsa-let-7a-3p   | OR | 0.11 | 0–8.43     | 4.8:1 |
| hsa-miR-455-5p  | OR | 0.37 | 0.05–2.98  | 4.8:1 |
| hsa-miR-105-3p  | FC | 0.56 | 0.18–1.87  | 4.8:1 |
| hsa-miR-27b-5p  | OR | 0.11 | 0–5.29     | 4.8:1 |
| hsa-miR-192-5p  | FC | 0.58 | 0.18–1.82  | 4.7:1 |
| hsa-miR-346     | FC | 1.67 | 0.54–4.74  | 4.7:1 |
| hsa-miR-30e-3p  | FC | 1.75 | 0.53–5.77  | 4.7:1 |
| hsa-miR-124-5p  | OR | 0.11 | 0–6.05     | 4.7:1 |
| hsa-miR-660-5p  | FC | 1.9  | 0.47–7.64  | 4.7:1 |
| hsa-miR-381     | OR | 2.13 | 0.44–10.76 | 4.6:1 |
| hsa-miR-548d-5p | OR | 0.11 | 0–8.38     | 4.6:1 |
| hsa-miR-522-3p  | OR | 0.12 | 0–6.58     | 4.6:1 |
| hsa-miR-216a    | OR | 2.34 | 0.32–13.18 | 4.5:1 |
| hsa-miR-411-3p  | OR | 0.48 | 0.09–2.33  | 4.5:1 |
| hsa-miR-1183    | FC | 1.65 | 0.55–4.62  | 4.5:1 |
| hsa-miR-339-5p  | FC | 0.56 | 0.17–1.96  | 4.5:1 |
| hsa-miR-876-5p  | OR | 0.12 | 0–6.14     | 4.5:1 |
| hsa-miR-218-5p  | OR | 2.12 | 0.43–12.36 | 4.5:1 |
| hsa-miR-34c-3p  | OR | 2.34 | 0.35–15    | 4.5:1 |
| hsa-miR-26a-5p  | FC | 1.65 | 0.56–5.05  | 4.5:1 |
| hsa-miR-328     | OR | 0.48 | 0.1–2.47   | 4.5:1 |
| hsa-miR-941     | OR | 0.12 | 0–8.37     | 4.5:1 |
| hsa-miR-632     | FC | 0.62 | 0.21–1.77  | 4.5:1 |

CI 95, 95% confidence intervals; POR, posterior odds ratio; FC, fold change; OR, odd ratio.

|                 |    |      |            |       |
|-----------------|----|------|------------|-------|
| hsa-miR-891b    | OR | 0.13 | 0–7.85     | 4.4:1 |
| hsa-miR-96-5p   | OR | 2.79 | 0.28–26.72 | 4.4:1 |
| hsa-miR-34c-5p  | OR | 0.13 | 0–6.25     | 4.4:1 |
| hsa-miR-489     | OR | 2.08 | 0.36–9.88  | 4.4:1 |
| hsa-miR-409-5p  | OR | 0.12 | 0–8.56     | 4.3:1 |
| hsa-miR-190b    | OR | 0.12 | 0–9.11     | 4.3:1 |
| hsa-miR-513a-5p | OR | 0.12 | 0–6.91     | 4.3:1 |
| hsa-miR-1296    | FC | 1.73 | 0.51–5.74  | 4.3:1 |
| hsa-miR-654-5p  | OR | 0.12 | 0–10.02    | 4.3:1 |
| hsa-miR-641     | OR | 0.12 | 0–10.49    | 4.3:1 |
| hsa-miR-615-5p  | OR | 0.13 | 0–7.27     | 4.3:1 |
| hsa-miR-33b-5p  | OR | 0.13 | 0–7.71     | 4.3:1 |
| hsa-miR-34a-3p  | OR | 2.75 | 0.28–27.17 | 4.3:1 |
| hsa-miR-365a-3p | OR | 2.11 | 0.41–10.88 | 4.3:1 |
| hsa-miR-601     | OR | 0.13 | 0–9.58     | 4.2:1 |
| hsa-miR-323a-3p | OR | 0.13 | 0–11.66    | 4.2:1 |
| hsa-miR-662     | FC | 1.89 | 0.45–7.47  | 4.2:1 |
| hsa-miR-553     | OR | 0.12 | 0–9.87     | 4.2:1 |
| hsa-miR-200b-3p | FC | 0.61 | 0.2–1.93   | 4.2:1 |
| hsa-miR-187-3p  | OR | 1.98 | 0.42–9.42  | 4.2:1 |
| hsa-miR-1913    | FC | 0.61 | 0.21–1.88  | 4.2:1 |
| hsa-miR-34b-3p  | OR | 0.13 | 0–8.49     | 4.1:1 |
| hsa-miR-496     | FC | 0.52 | 0.13–2.32  | 4.1:1 |
| hsa-miR-1203    | OR | 2.12 | 0.36–12.16 | 4.1:1 |
| hsa-miR-199a-5p | OR | 1.96 | 0.41–9.46  | 4.1:1 |
| hsa-miR-215     | FC | 0.59 | 0.17–1.96  | 4:01  |
| hsa-miR-1539    | FC | 1.75 | 0.5–6.95   | 4:01  |
| hsa-miR-324-3p  | FC | 1.59 | 0.53–4.61  | 3.9:1 |
| hsa-miR-105-5p  | OR | 0.13 | 0–7.97     | 3.9:1 |
| hsa-miR-622     | OR | 0.51 | 0.1–2.43   | 3.9:1 |
| hsa-let-7a-5p   | FC | 1.65 | 0.55–5.76  | 3.9:1 |
| hsa-miR-1184    | OR | 2.3  | 0.29–20.49 | 3.9:1 |
| hsa-miR-125a-5p | FC | 0.61 | 0.19–1.95  | 3.9:1 |
| hsa-miR-375     | FC | 0.63 | 0.2–1.86   | 3.9:1 |
| hsa-miR-617     | OR | 0.48 | 0.09–2.98  | 3.9:1 |
| hsa-miR-877-5p  | OR | 1.88 | 0.41–8.66  | 3.8:1 |
| hsa-miR-106b-5p | OR | 0.5  | 0.09–2.65  | 3.8:1 |
| hsa-miR-29b-3p  | FC | 0.58 | 0.17–2.01  | 3.8:1 |
| hsa-miR-627     | OR | 2.37 | 0.28–22.86 | 3.8:1 |
| hsa-miR-1227    | OR | 2.35 | 0.29–21.08 | 3.8:1 |
| hsa-miR-99b-5p  | FC | 0.63 | 0.2–1.95   | 3.8:1 |
| hsa-miR-636     | FC | 1.78 | 0.43–7.16  | 3.7:1 |
| hsa-miR-376c    | OR | 1.82 | 0.41–8.19  | 3.7:1 |
| hsa-miR-99b-3p  | OR | 1.83 | 0.4–8.62   | 3.7:1 |
| hsa-miR-142-3p  | FC | 1.72 | 0.44–6.97  | 3.7:1 |
| hsa-miR-324-5p  | OR | 0.55 | 0.12–2.52  | 3.6:1 |
| hsa-miR-10a-3p  | OR | 1.83 | 0.43–8.95  | 3.6:1 |
| hsa-miR-541-3p  | OR | 2.29 | 0.29–18.55 | 3.5:1 |
| hsa-miR-182-3p  | FC | 1.6  | 0.5–5.2    | 3.5:1 |
| hsa-miR-769-3p  | OR | 2.23 | 0.26–18.51 | 3.5:1 |

CI 95, 95% confidence intervals; POR, posterior odds ratio; FC, fold change; OR, odd ratio.

|                   |    |      |            |       |
|-------------------|----|------|------------|-------|
| hsa-miR-1254      | OR | 1.81 | 0.41–8.42  | 3.5:1 |
| hsa-miR-604       | FC | 0.66 | 0.22–1.89  | 3.5:1 |
| hsa-miR-145-5p    | OR | 0.56 | 0.12–2.61  | 3.5:1 |
| hsa-miR-10a-5p    | FC | 1.55 | 0.49–4.72  | 3.4:1 |
| hsa-miR-146a-3p   | OR | 1.98 | 0.35–12.19 | 3.4:1 |
| hsa-miR-26b-5p    | FC | 1.62 | 0.45–5.56  | 3.4:1 |
| hsa-miR-642a-5p   | OR | 1.77 | 0.38–7.76  | 3.4:1 |
| hsa-miR-425-5p    | FC | 1.75 | 0.43–7.72  | 3.3:1 |
| hsa-miR-218-1-3p  | FC | 0.65 | 0.22–2.11  | 3.3:1 |
| hsa-let-7d-5p     | FC | 1.67 | 0.44–7.29  | 3.3:1 |
| hsa-miR-140-3p    | FC | 0.59 | 0.15–2.45  | 3.3:1 |
| hsa-miR-200a-3p   | FC | 1.52 | 0.46–4.67  | 3.3:1 |
| hsa-miR-150-5p    | FC | 0.57 | 0.13–2.57  | 3.3:1 |
| hsa-miR-136-5p    | OR | 0.45 | 0.05–3.95  | 3.3:1 |
| hsa-miR-371a-3p   | OR | 0.46 | 0.05–3.63  | 3.3:1 |
| hsa-miR-1238      | OR | 0.46 | 0.05–3.53  | 3.3:1 |
| hsa-miR-619       | OR | 1.79 | 0.37–8.31  | 3.3:1 |
| hsa-miR-342-3p    | FC | 0.64 | 0.2–2.18   | 3.3:1 |
| hsa-miR-93-5p     | FC | 0.67 | 0.23–2.04  | 3.2:1 |
| hsa-miR-411-5p    | OR | 1.72 | 0.39–7.87  | 3.2:1 |
| hsa-miR-658       | OR | 2.05 | 0.3–18.48  | 3.2:1 |
| hsa-miR-558       | FC | 1.54 | 0.46–4.92  | 3.2:1 |
| hsa-miR-193b-5p   | OR | 1.82 | 0.36–9.6   | 3.2:1 |
| hsa-miR-30c-2-3p  | OR | 1.71 | 0.37–8.14  | 3.2:1 |
| hsa-miR-126-5p    | OR | 1.73 | 0.36–7.5   | 3.2:1 |
| hsa-miR-107       | FC | 0.6  | 0.15–2.49  | 3.1:1 |
| hsa-miR-125b-1-3p | OR | 2.08 | 0.24–17.66 | 3.1:1 |
| hsa-miR-548b-3p   | OR | 0.5  | 0.07–3.45  | 3.1:1 |
| hsa-miR-23a-5p    | OR | 2.06 | 0.28–17.18 | 3.1:1 |
| hsa-miR-582-5p    | OR | 2.11 | 0.27–16.82 | 3.1:1 |
| hsa-miR-18b-3p    | OR | 2.05 | 0.25–16.82 | 3.1:1 |
| hsa-miR-490-3p    | FC | 1.47 | 0.49–4.4   | 3.1:1 |
| hsa-miR-557       | OR | 2.06 | 0.25–16.71 | 3.1:1 |
| hsa-miR-675-3p    | OR | 1.71 | 0.35–7.28  | 3.1:1 |
| hsa-miR-302a-5p   | OR | 0.53 | 0.08–2.93  | 3.1:1 |
| hsa-miR-30d-3p    | FC | 1.5  | 0.45–4.63  | 3:01  |
| hsa-miR-23b-3p    | FC | 1.48 | 0.48–4.27  | 3:01  |
| hsa-miR-339-3p    | OR | 0.54 | 0.09–3.02  | 3:01  |
| hsa-miR-1269a     | OR | 1.69 | 0.39–7.86  | 3:01  |
| hsa-miR-330-5p    | OR | 2.01 | 0.24–15.88 | 3:01  |
| hsa-miR-1205      | OR | 1.73 | 0.37–9.34  | 3:01  |
| hsa-miR-18b-5p    | FC | 1.47 | 0.46–4.48  | 3:01  |
| hsa-miR-92b-5p    | OR | 1.68 | 0.36–7.14  | 3:01  |
| hsa-miR-638       | FC | 0.7  | 0.25–1.98  | 2.9:1 |
| hsa-let-7d-3p     | FC | 0.69 | 0.24–2.06  | 2.9:1 |
| hsa-miR-140-5p    | OR | 1.66 | 0.37–7.43  | 2.9:1 |
| hsa-miR-518c-5p   | OR | 0.49 | 0.05–4.08  | 2.9:1 |
| hsa-miR-431-3p    | OR | 1.69 | 0.35–9.04  | 2.8:1 |
| hsa-miR-891a      | OR | 0.5  | 0.06–3.85  | 2.8:1 |
| hsa-miR-566       | OR | 1.7  | 0.31–8.08  | 2.8:1 |

CI 95, 95% confidence intervals; POR, posterior odds ratio; FC, fold change; OR, odd ratio.

|                  |    |      |            |       |
|------------------|----|------|------------|-------|
| hsa-miR-143-3p   | OR | 1.61 | 0.32–8.11  | 2.8:1 |
| hsa-miR-645      | OR | 0.55 | 0.09–3.3   | 2.8:1 |
| hsa-miR-142-5p   | OR | 0.6  | 0.13–3.35  | 2.7:1 |
| hsa-miR-584-5p   | FC | 0.66 | 0.17–2.39  | 2.7:1 |
| hsa-miR-7-5p     | OR | 1.67 | 0.34–8.69  | 2.7:1 |
| hsa-miR-30c-1-3p | OR | 0.51 | 0.05–4.23  | 2.7:1 |
| hsa-miR-491-3p   | OR | 0.49 | 0.05–4.78  | 2.7:1 |
| hsa-miR-615-3p   | FC | 0.71 | 0.23–1.99  | 2.7:1 |
| hsa-miR-423-5p   | FC | 0.69 | 0.19–2.31  | 2.7:1 |
| hsa-miR-592      | OR | 2.2  | 0.14–37.27 | 2.7:1 |
| hsa-miR-614      | OR | 2.19 | 0.14–32.42 | 2.7:1 |
| hsa-miR-374b-3p  | OR | 2.18 | 0.14–35.91 | 2.6:1 |
| hsa-miR-942      | OR | 2.2  | 0.13–34.48 | 2.6:1 |
| hsa-miR-148b-5p  | OR | 2.16 | 0.13–34.38 | 2.6:1 |
| hsa-miR-888-3p   | OR | 2.21 | 0.15–36.71 | 2.6:1 |
| hsa-miR-26a-1-3p | OR | 2.21 | 0.16–36.86 | 2.6:1 |
| hsa-miR-194-3p   | OR | 1.62 | 0.32–7.87  | 2.6:1 |
| hsa-miR-501-3p   | OR | 1.59 | 0.32–7.53  | 2.6:1 |
| hsa-miR-634      | OR | 2.2  | 0.14–33.43 | 2.6:1 |
| hsa-miR-603      | FC | 1.39 | 0.49–4.2   | 2.6:1 |
| hsa-miR-889      | OR | 2.15 | 0.13–34.58 | 2.6:1 |
| hsa-miR-331-5p   | FC | 0.73 | 0.24–2.08  | 2.6:1 |
| hsa-miR-21-3p    | OR | 0.22 | 0–22.41    | 2.6:1 |
| hsa-miR-556-5p   | OR | 2.1  | 0.15–33.71 | 2.5:1 |
| hsa-let-7a-2-3p  | OR | 2.17 | 0.15–38.44 | 2.5:1 |
| hsa-miR-675-5p   | OR | 0.21 | 0–12.3     | 2.5:1 |
| hsa-miR-22-5p    | OR | 2.15 | 0.14–34.68 | 2.5:1 |
| hsa-miR-323a-5p  | OR | 1.8  | 0.23–13.42 | 2.5:1 |
| hsa-miR-518a-5p  | OR | 0.24 | 0–15.36    | 2.5:1 |
| hsa-miR-578      | OR | 0.22 | 0–25.37    | 2.5:1 |
| hsa-miR-20b-3p   | OR | 2.12 | 0.13–31.89 | 2.5:1 |
| hsa-miR-96-3p    | OR | 0.23 | 0–16.86    | 2.5:1 |
| hsa-miR-129-1-3p | OR | 0.23 | 0–15.23    | 2.5:1 |
| hsa-miR-363-5p   | OR | 0.22 | 0–16.13    | 2.5:1 |
| hsa-miR-196b-3p  | OR | 2.09 | 0.12–33.63 | 2.5:1 |
| hsa-miR-1178     | OR | 0.21 | 0–13.34    | 2.5:1 |
| hsa-miR-449a     | OR | 0.23 | 0–14.06    | 2.5:1 |
| hsa-miR-521      | OR | 0.23 | 0–18.54    | 2.5:1 |
| hsa-miR-541-5p   | OR | 0.22 | 0–18.93    | 2.5:1 |
| hsa-miR-1265     | OR | 2.15 | 0.14–35.48 | 2.5:1 |
| hsa-miR-362-3p   | OR | 0.22 | 0–16.87    | 2.5:1 |
| hsa-miR-607      | OR | 0.23 | 0–22.61    | 2.5:1 |
| hsa-miR-130a-5p  | OR | 0.23 | 0–17.53    | 2.5:1 |
| hsa-miR-15a-3p   | OR | 2.17 | 0.14–33.31 | 2.5:1 |
| hsa-miR-1200     | OR | 2.14 | 0.13–34.11 | 2.5:1 |
| hsa-miR-181c-3p  | OR | 0.23 | 0–17.18    | 2.5:1 |
| hsa-miR-296-5p   | OR | 2.17 | 0.14–37.73 | 2.5:1 |
| hsa-miR-191-3p   | OR | 0.23 | 0–14.81    | 2.5:1 |
| hsa-miR-1204     | OR | 0.22 | 0–14.63    | 2.5:1 |
| hsa-miR-654-3p   | FC | 1.39 | 0.47–4.37  | 2.5:1 |

CI 95, 95% confidence intervals; POR, posterior odds ratio; FC, fold change; OR, odd ratio.



|                  |    |      |            |       |
|------------------|----|------|------------|-------|
| hsa-miR-145-3p   | OR | 0.23 | 0–18.11    | 2.5:1 |
| hsa-miR-620      | OR | 0.22 | 0–19.59    | 2.5:1 |
| hsa-miR-506-3p   | OR | 2.13 | 0.14–35.74 | 2.5:1 |
| hsa-miR-424-3p   | OR | 0.22 | 0–17.57    | 2.5:1 |
| hsa-miR-519b-3p  | OR | 0.22 | 0–13.66    | 2.5:1 |
| hsa-miR-337-5p   | OR | 0.22 | 0–16.44    | 2.5:1 |
| hsa-let-7c       | FC | 1.38 | 0.43–4.29  | 2.5:1 |
| hsa-let-7g-3p    | OR | 2.1  | 0.15–37.94 | 2.5:1 |
| hsa-miR-1236     | OR | 0.22 | 0–16.1     | 2.5:1 |
| hsa-miR-135a-3p  | OR | 0.22 | 0–19.45    | 2.5:1 |
| hsa-miR-450b-5p  | OR | 0.22 | 0–17.6     | 2.5:1 |
| hsa-miR-933      | OR | 2.09 | 0.14–32.4  | 2.5:1 |
| hsa-miR-147a     | OR | 0.23 | 0–17.31    | 2.5:1 |
| hsa-miR-519e-3p  | OR | 0.23 | 0–20.85    | 2.5:1 |
| hsa-miR-502-5p   | FC | 0.73 | 0.25–2.06  | 2.5:1 |
| hsa-miR-219-5p   | OR | 0.23 | 0–15.02    | 2.5:1 |
| hsa-miR-579      | OR | 0.22 | 0–21.35    | 2.5:1 |
| hsa-miR-135b-3p  | OR | 2.14 | 0.16–37.75 | 2.5:1 |
| hsa-miR-151a-3p  | FC | 1.4  | 0.45–4.89  | 2.4:1 |
| hsa-miR-1185-5p  | OR | 0.23 | 0–15.19    | 2.4:1 |
| hsa-miR-1248     | OR | 0.22 | 0–14.49    | 2.4:1 |
| hsa-miR-412      | OR | 1.59 | 0.29–9.49  | 2.4:1 |
| hsa-miR-448      | OR | 0.23 | 0–14.5     | 2.4:1 |
| hsa-miR-137      | OR | 0.23 | 0–17.01    | 2.4:1 |
| hsa-miR-19b-1-5p | OR | 0.22 | 0–17.58    | 2.4:1 |
| hsa-miR-513a-3p  | OR | 0.22 | 0–13.76    | 2.4:1 |
| hsa-miR-520g     | OR | 0.22 | 0–22.78    | 2.4:1 |
| hsa-miR-146b-3p  | OR | 0.22 | 0–15.75    | 2.4:1 |
| hsa-miR-515-3p   | OR | 0.23 | 0–15.16    | 2.4:1 |
| hsa-miR-337-3p   | OR | 0.22 | 0–17.18    | 2.4:1 |
| hsa-miR-488-3p   | OR | 0.23 | 0–15.1     | 2.4:1 |
| hsa-miR-518e-3p  | OR | 0.23 | 0–12.65    | 2.4:1 |
| hsa-miR-520a-3p  | OR | 0.24 | 0–19.88    | 2.4:1 |
| hsa-miR-876-3p   | OR | 0.24 | 0–14.76    | 2.4:1 |
| hsa-miR-302b-3p  | OR | 0.22 | 0–26       | 2.4:1 |
| hsa-miR-516a-3p  | OR | 0.22 | 0–17.57    | 2.4:1 |
| hsa-miR-890      | OR | 0.24 | 0–19.09    | 2.4:1 |
| hsa-miR-369-5p   | OR | 0.24 | 0–17.3     | 2.4:1 |
| hsa-miR-610      | OR | 0.23 | 0–15.82    | 2.4:1 |
| hsa-miR-1245a    | OR | 0.23 | 0–16.33    | 2.4:1 |
| hsa-miR-335-3p   | OR | 0.23 | 0–17.27    | 2.4:1 |
| hsa-miR-1252     | OR | 0.22 | 0–14.01    | 2.4:1 |
| hsa-miR-432-3p   | OR | 0.23 | 0–18.02    | 2.4:1 |
| hsa-miR-586      | OR | 0.22 | 0–16.87    | 2.4:1 |
| hsa-miR-26a-2-3p | OR | 0.22 | 0–20.28    | 2.4:1 |
| hsa-miR-299-3p   | OR | 0.22 | 0–15.64    | 2.4:1 |
| hsa-miR-524-3p   | OR | 0.22 | 0–19.81    | 2.4:1 |
| hsa-miR-556-3p   | OR | 0.23 | 0–24.84    | 2.4:1 |
| hsa-miR-600      | OR | 0.22 | 0–15.44    | 2.4:1 |
| hsa-miR-767-5p   | OR | 0.23 | 0–11.95    | 2.4:1 |

CI 95, 95% confidence intervals; POR, posterior odds ratio; FC, fold change; OR, odd ratio.

|                  |    |      |           |       |
|------------------|----|------|-----------|-------|
| hsa-miR-340-5p   | OR | 0.23 | 0–15.7    | 2.4:1 |
| hsa-miR-422a     | OR | 0.23 | 0–18.14   | 2.4:1 |
| hsa-miR-520e     | OR | 0.22 | 0–20.21   | 2.4:1 |
| hsa-miR-33a-3p   | OR | 1.6  | 0.29–9.44 | 2.4:1 |
| hsa-miR-1264     | OR | 0.23 | 0–21.71   | 2.4:1 |
| hsa-miR-302e     | OR | 0.23 | 0–15.03   | 2.4:1 |
| hsa-miR-626      | OR | 0.23 | 0–13.75   | 2.4:1 |
| hsa-miR-938      | OR | 0.22 | 0–13.61   | 2.4:1 |
| hsa-miR-202-5p   | OR | 0.22 | 0–18.59   | 2.4:1 |
| hsa-miR-544a     | OR | 0.23 | 0–13.37   | 2.4:1 |
| hsa-miR-516b-5p  | OR | 0.23 | 0–20.37   | 2.4:1 |
| hsa-miR-219-2-3p | OR | 0.23 | 0–14.23   | 2.4:1 |
| hsa-miR-1537     | OR | 0.22 | 0–16.13   | 2.4:1 |
| hsa-miR-384      | OR | 0.23 | 0–14.45   | 2.4:1 |
| hsa-miR-520c-3p  | OR | 0.25 | 0–13.31   | 2.4:1 |
| hsa-miR-875-5p   | OR | 0.23 | 0–13.76   | 2.4:1 |
| hsa-miR-380-3p   | OR | 0.23 | 0–20.56   | 2.4:1 |
| hsa-miR-591      | OR | 0.23 | 0–15.56   | 2.4:1 |
| hsa-miR-647      | OR | 0.23 | 0–23.36   | 2.4:1 |
| hsa-miR-214-3p   | FC | 0.7  | 0.19–2.44 | 2.4:1 |
| hsa-miR-599      | OR | 0.23 | 0–13.26   | 2.4:1 |
| hsa-miR-377-3p   | OR | 0.23 | 0–16.22   | 2.4:1 |
| hsa-miR-518b     | OR | 0.23 | 0–19.45   | 2.4:1 |
| hsa-miR-520b     | OR | 0.24 | 0–19.98   | 2.4:1 |
| hsa-miR-194-5p   | FC | 1.38 | 0.41–4.41 | 2.4:1 |
| hsa-miR-1243     | OR | 0.23 | 0–16.78   | 2.4:1 |
| hsa-miR-487b     | OR | 0.23 | 0–17.92   | 2.4:1 |
| hsa-miR-588      | OR | 0.23 | 0–16.66   | 2.4:1 |
| hsa-miR-518c-3p  | OR | 0.22 | 0–14.31   | 2.4:1 |
| hsa-miR-523-3p   | OR | 1.52 | 0.34–7.37 | 2.4:1 |
| hsa-miR-561-3p   | OR | 0.23 | 0–16.28   | 2.3:1 |
| hsa-miR-498      | OR | 0.24 | 0–11.82   | 2.3:1 |
| hsa-miR-574-3p   | FC | 0.75 | 0.25–2.22 | 2.3:1 |
| hsa-miR-924      | OR | 0.25 | 0–16.18   | 2.3:1 |
| hsa-miR-183-3p   | OR | 0.23 | 0–18.62   | 2.3:1 |
| hsa-miR-222-5p   | OR | 0.23 | 0–14.35   | 2.3:1 |
| hsa-miR-517b-3p  | OR | 0.23 | 0–17.81   | 2.3:1 |
| hsa-miR-921      | OR | 0.22 | 0–17.42   | 2.3:1 |
| hsa-miR-1263     | OR | 0.22 | 0–18.32   | 2.3:1 |
| hsa-miR-302c-3p  | OR | 0.23 | 0–12.34   | 2.3:1 |
| hsa-miR-376a-5p  | OR | 0.23 | 0–13.89   | 2.3:1 |
| hsa-miR-494      | OR | 0.22 | 0–18.16   | 2.3:1 |
| hsa-miR-2053     | OR | 0.23 | 0–16.44   | 2.3:1 |
| hsa-miR-155-5p   | OR | 1.57 | 0.26–8.23 | 2.3:1 |
| hsa-miR-155-3p   | OR | 0.23 | 0–18.6    | 2.3:1 |
| hsa-miR-138-1-3p | OR | 0.22 | 0–20.72   | 2.3:1 |
| hsa-miR-367-3p   | OR | 0.23 | 0–17.44   | 2.3:1 |
| hsa-miR-130b-3p  | OR | 0.24 | 0–14.05   | 2.3:1 |
| hsa-miR-653      | OR | 1.58 | 0.3–9     | 2.3:1 |
| hsa-miR-210      | FC | 0.69 | 0.18–2.86 | 2.3:1 |

CI 95, 95% confidence intervals; POR, posterior odds ratio; FC, fold change; OR, odd ratio.

|                  |    |      |            |       |
|------------------|----|------|------------|-------|
| hsa-miR-100-3p   | OR | 0.24 | 0–17.97    | 2.3:1 |
| hsa-miR-519a-3p  | OR | 0.25 | 0–17.43    | 2.3:1 |
| hsa-miR-519c-3p  | OR | 0.23 | 0–18.15    | 2.3:1 |
| hsa-miR-31-3p    | OR | 1.59 | 0.29–8.98  | 2.3:1 |
| hsa-miR-374b-5p  | FC | 1.44 | 0.4–5.82   | 2.3:1 |
| hsa-miR-520d-5p  | OR | 0.24 | 0–10.84    | 2.3:1 |
| hsa-miR-503      | OR | 0.66 | 0.12–3.09  | 2.3:1 |
| hsa-miR-555      | FC | 1.36 | 0.38–4.54  | 2.3:1 |
| hsa-miR-208b     | OR | 0.24 | 0–18.22    | 2.3:1 |
| hsa-miR-452-5p   | FC | 1.41 | 0.37–5.41  | 2.3:1 |
| hsa-miR-1206     | OR | 0.25 | 0–15.91    | 2.3:1 |
| hsa-miR-195-5p   | OR | 1.57 | 0.27–8.57  | 2.3:1 |
| hsa-miR-99a-3p   | OR | 0.65 | 0.14–3.37  | 2.3:1 |
| hsa-miR-200c-5p  | OR | 0.24 | 0–14.91    | 2.3:1 |
| hsa-miR-433      | FC | 0.73 | 0.21–2.69  | 2.3:1 |
| hsa-miR-193a-5p  | FC | 1.36 | 0.4–4.49   | 2.2:1 |
| hsa-miR-29c-5p   | OR | 0.66 | 0.13–3.2   | 2.2:1 |
| hsa-miR-628-5p   | FC | 1.31 | 0.43–4.03  | 2.2:1 |
| hsa-miR-1179     | OR | 1.46 | 0.32–7.07  | 2.2:1 |
| hsa-miR-92a-3p   | FC | 0.76 | 0.24–2.27  | 2.2:1 |
| hsa-miR-548h-5p  | OR | 0.66 | 0.13–3.22  | 2.2:1 |
| hsa-miR-500a-5p  | OR | 1.46 | 0.33–7.02  | 2.2:1 |
| hsa-miR-188-5p   | OR | 1.5  | 0.25–7.9   | 2.2:1 |
| hsa-miR-587      | OR | 1.8  | 0.12–25.15 | 2.2:1 |
| hsa-miR-490-5p   | OR | 1.79 | 0.14–28.04 | 2.2:1 |
| hsa-miR-449b-3p  | OR | 1.82 | 0.13–25.55 | 2.2:1 |
| hsa-miR-526b-5p  | OR | 1.83 | 0.13–26.61 | 2.2:1 |
| hsa-miR-27a-3p   | FC | 1.31 | 0.41–4.07  | 2.2:1 |
| hsa-miR-32-5p    | OR | 1.85 | 0.14–31.41 | 2.1:1 |
| hsa-let-7g-5p    | FC | 0.73 | 0.21–2.43  | 2.1:1 |
| hsa-miR-200c-3p  | FC | 1.29 | 0.43–3.58  | 2.1:1 |
| hsa-miR-30b-5p   | FC | 0.74 | 0.22–2.69  | 2.1:1 |
| hsa-miR-208a     | OR | 1.81 | 0.13–27.72 | 2.1:1 |
| hsa-let-7i-3p    | OR | 1.79 | 0.15–28.06 | 2.1:1 |
| hsa-miR-548m     | OR | 0.59 | 0.06–5.01  | 2.1:1 |
| hsa-miR-1911-5p  | OR | 1.81 | 0.14–31.41 | 2.1:1 |
| hsa-miR-554      | OR | 1.83 | 0.13–27.63 | 2.1:1 |
| hsa-miR-323b-5p  | FC | 1.34 | 0.36–4.68  | 2.1:1 |
| hsa-miR-361-3p   | FC | 1.33 | 0.39–4.62  | 2.1:1 |
| hsa-miR-1253     | OR | 1.8  | 0.13–29.94 | 2.1:1 |
| hsa-miR-325      | OR | 1.83 | 0.12–23.73 | 2.1:1 |
| hsa-miR-509-3-5p | OR | 1.81 | 0.15–28.39 | 2.1:1 |
| hsa-miR-802      | OR | 1.83 | 0.15–29.07 | 2.1:1 |
| hsa-miR-30d-5p   | FC | 0.76 | 0.25–2.55  | 2.1:1 |
| hsa-miR-663b     | FC | 0.72 | 0.18–3.07  | 2.1:1 |
| hsa-miR-548l     | OR | 1.82 | 0.12–27.15 | 2.1:1 |
| hsa-miR-106b-3p  | OR | 1.45 | 0.25–7.91  | 2.1:1 |
| hsa-miR-549      | OR | 1.82 | 0.11–24.88 | 2.1:1 |
| hsa-miR-214-5p   | OR | 1.75 | 0.12–25.03 | 2.1:1 |
| hsa-miR-184      | OR | 1.54 | 0.2–11.1   | 2:01  |

CI 95, 95% confidence intervals; POR, posterior odds ratio; FC, fold change; OR, odd ratio.

|                   |    |      |            |       |
|-------------------|----|------|------------|-------|
| hsa-miR-526b-3p   | OR | 1.78 | 0.11–24.75 | 2:01  |
| hsa-miR-126-3p    | OR | 0.71 | 0.15–3.22  | 2:01  |
| hsa-miR-937       | FC | 0.77 | 0.26–2.32  | 2:01  |
| hsa-miR-373-3p    | OR | 0.6  | 0.06–5.27  | 2:01  |
| hsa-miR-191-5p    | FC | 1.21 | 0.49–2.8   | 2:01  |
| hsa-miR-766-3p    | OR | 1.39 | 0.3–6.07   | 2:01  |
| hsa-miR-628-3p    | OR | 0.68 | 0.12–4.16  | 2:01  |
| hsa-miR-640       | OR | 0.72 | 0.16–3.48  | 1.9:1 |
| hsa-miR-664-3p    | OR | 1.38 | 0.31–6.36  | 1.9:1 |
| hsa-miR-331-3p    | OR | 1.38 | 0.31–7.39  | 1.9:1 |
| hsa-miR-29a-5p    | OR | 0.71 | 0.16–3.12  | 1.9:1 |
| hsa-miR-345-5p    | OR | 0.61 | 0.07–5.83  | 1.9:1 |
| hsa-miR-598       | FC | 0.8  | 0.28–2.51  | 1.9:1 |
| hsa-miR-744-5p    | OR | 1.38 | 0.28–6.3   | 1.9:1 |
| hsa-miR-429       | FC | 1.28 | 0.39–4.66  | 1.9:1 |
| hsa-miR-2110      | FC | 0.8  | 0.27–2.26  | 1.9:1 |
| hsa-miR-593-3p    | OR | 1.36 | 0.31–6.77  | 1.9:1 |
| hsa-miR-20a-5p    | FC | 0.77 | 0.22–2.65  | 1.9:1 |
| hsa-miR-183-5p    | FC | 0.79 | 0.23–2.59  | 1.8:1 |
| hsa-miR-671-5p    | FC | 1.24 | 0.43–3.55  | 1.8:1 |
| hsa-miR-631       | OR | 1.35 | 0.28–5.81  | 1.8:1 |
| hsa-miR-720       | FC | 1.22 | 0.41–3.46  | 1.8:1 |
| hsa-miR-122-3p    | OR | 1.37 | 0.24–7.5   | 1.8:1 |
| hsa-miR-590-5p    | OR | 0.72 | 0.12–3.99  | 1.8:1 |
| hsa-miR-143-5p    | OR | 0.71 | 0.12–4.26  | 1.8:1 |
| hsa-miR-34a-5p    | OR | 0.74 | 0.16–3.61  | 1.8:1 |
| hsa-miR-1471      | FC | 0.83 | 0.28–2.46  | 1.8:1 |
| hsa-miR-129-2-3p  | OR | 0.67 | 0.08–5.54  | 1.8:1 |
| hsa-miR-548j      | OR | 0.66 | 0.08–6.43  | 1.8:1 |
| hsa-miR-338-3p    | OR | 1.39 | 0.21–9.76  | 1.8:1 |
| hsa-miR-1244      | FC | 0.8  | 0.23–2.54  | 1.8:1 |
| hsa-miR-28-5p     | OR | 0.73 | 0.14–3.52  | 1.8:1 |
| hsa-miR-1249      | OR | 1.39 | 0.19–9.9   | 1.8:1 |
| hsa-miR-564       | FC | 0.83 | 0.26–2.29  | 1.8:1 |
| hsa-miR-326       | OR | 0.73 | 0.11–4.17  | 1.7:1 |
| hsa-miR-378a-5p   | OR | 0.67 | 0.07–5.76  | 1.7:1 |
| hsa-miR-10b-3p    | OR | 0.71 | 0.11–4.76  | 1.7:1 |
| hsa-miR-532-3p    | FC | 0.79 | 0.19–2.95  | 1.7:1 |
| hsa-miR-887       | OR | 1.29 | 0.29–5.73  | 1.7:1 |
| hsa-miR-1208      | OR | 1.37 | 0.23–10.25 | 1.7:1 |
| hsa-miR-100-5p    | FC | 1.23 | 0.39–4.07  | 1.7:1 |
| hsa-miR-1237      | OR | 0.72 | 0.12–4.26  | 1.7:1 |
| hsa-miR-181a-2-3p | OR | 1.32 | 0.25–6.24  | 1.7:1 |
| hsa-miR-509-3p    | FC | 1.21 | 0.37–3.63  | 1.7:1 |
| hsa-miR-148a-5p   | OR | 0.67 | 0.08–6.13  | 1.7:1 |
| hsa-miR-371a-5p   | OR | 1.36 | 0.2–8.99   | 1.7:1 |
| hsa-miR-551a      | OR | 1.29 | 0.27–6.12  | 1.7:1 |
| hsa-miR-192-3p    | OR | 0.67 | 0.07–5.45  | 1.7:1 |
| hsa-miR-148a-3p   | FC | 0.8  | 0.19–3.26  | 1.7:1 |
| hsa-miR-518a-3p   | OR | 0.67 | 0.07–5.36  | 1.7:1 |

CI 95, 95% confidence intervals; POR, posterior odds ratio; FC, fold change; OR, odd ratio.

|                   |    |      |            |       |
|-------------------|----|------|------------|-------|
| hsa-miR-1266      | FC | 0.84 | 0.3–2.55   | 1.7:1 |
| hsa-miR-29b-1-5p  | FC | 1.19 | 0.44–3.69  | 1.7:1 |
| hsa-miR-151a-5p   | FC | 1.2  | 0.34–4.02  | 1.7:1 |
| hsa-miR-185-3p    | FC | 1.22 | 0.34–4.44  | 1.6:1 |
| hsa-miR-196a-5p   | FC | 1.22 | 0.33–4.3   | 1.6:1 |
| hsa-miR-222-3p    | FC | 0.84 | 0.27–3.07  | 1.6:1 |
| hsa-miR-302a-3p   | OR | 1.26 | 0.26–5.35  | 1.6:1 |
| hsa-miR-99a-5p    | FC | 0.85 | 0.27–2.65  | 1.6:1 |
| hsa-miR-335-5p    | OR | 0.8  | 0.16–3.53  | 1.6:1 |
| hsa-miR-25-3p     | FC | 0.84 | 0.25–2.71  | 1.6:1 |
| hsa-miR-135a-5p   | OR | 0.8  | 0.17–3.71  | 1.6:1 |
| hsa-miR-200b-5p   | FC | 0.84 | 0.25–3.12  | 1.5:1 |
| hsa-miR-519d      | OR | 0.72 | 0.08–6.42  | 1.5:1 |
| hsa-miR-125b-5p   | FC | 0.86 | 0.29–2.88  | 1.5:1 |
| hsa-miR-124-3p    | FC | 1.18 | 0.33–4     | 1.5:1 |
| hsa-miR-95        | FC | 1.21 | 0.29–4.85  | 1.5:1 |
| hsa-miR-103a-2-5p | OR | 0.72 | 0.08–6.92  | 1.5:1 |
| hsa-miR-33a-5p    | FC | 1.14 | 0.37–3.38  | 1.5:1 |
| hsa-miR-30a-5p    | FC | 0.86 | 0.28–2.65  | 1.5:1 |
| hsa-miR-510       | OR | 1.2  | 0.26–5.78  | 1.5:1 |
| hsa-miR-185-5p    | FC | 0.85 | 0.21–2.98  | 1.5:1 |
| hsa-miR-518f-3p   | OR | 0.74 | 0.07–7.46  | 1.5:1 |
| hsa-miR-141-5p    | FC | 0.88 | 0.32–2.59  | 1.5:1 |
| hsa-miR-9-5p      | FC | 0.85 | 0.23–3.34  | 1.4:1 |
| hsa-miR-562       | FC | 1.12 | 0.39–3.26  | 1.4:1 |
| hsa-miR-149-3p    | FC | 0.86 | 0.24–3.14  | 1.4:1 |
| hsa-miR-708-3p    | FC | 0.88 | 0.26–2.81  | 1.4:1 |
| hsa-let-7f-5p     | FC | 0.88 | 0.26–2.84  | 1.4:1 |
| hsa-miR-146a-5p   | FC | 0.87 | 0.22–3.5   | 1.4:1 |
| hsa-miR-193a-3p   | OR | 0.76 | 0.08–8.44  | 1.4:1 |
| hsa-miR-520a-5p   | OR | 0.77 | 0.08–9.07  | 1.4:1 |
| hsa-miR-148b-3p   | OR | 1.17 | 0.21–6.42  | 1.4:1 |
| hsa-miR-643       | OR | 1.19 | 0.2–5.91   | 1.4:1 |
| hsa-miR-25-5p     | OR | 1.21 | 0.11–13.7  | 1.4:1 |
| hsa-miR-204-5p    | FC | 0.89 | 0.3–2.76   | 1.3:1 |
| hsa-miR-484       | FC | 0.91 | 0.31–2.74  | 1.3:1 |
| hsa-miR-31-5p     | FC | 1.13 | 0.35–3.76  | 1.3:1 |
| hsa-miR-497-5p    | OR | 0.85 | 0.16–4.68  | 1.3:1 |
| hsa-miR-221-3p    | FC | 0.89 | 0.22–3.22  | 1.3:1 |
| hsa-miR-659-3p    | OR | 1.16 | 0.11–13.58 | 1.3:1 |
| hsa-miR-138-5p    | OR | 0.86 | 0.17–4.89  | 1.3:1 |
| hsa-miR-450a-5p   | OR | 0.87 | 0.17–4.42  | 1.3:1 |
| hsa-miR-29a-3p    | FC | 0.89 | 0.21–3.69  | 1.3:1 |
| hsa-miR-103b      | FC | 1.1  | 0.26–4.09  | 1.3:1 |
| hsa-miR-873-5p    | OR | 1.18 | 0.11–14.08 | 1.3:1 |
| hsa-miR-93-3p     | OR | 1.13 | 0.19–5.36  | 1.3:1 |
| hsa-miR-132-3p    | FC | 1.09 | 0.35–3.16  | 1.3:1 |
| hsa-miR-760       | FC | 0.91 | 0.29–2.88  | 1.3:1 |
| hsa-miR-361-5p    | OR | 1.17 | 0.11–12.84 | 1.3:1 |
| hsa-miR-212-3p    | FC | 1.11 | 0.32–4.37  | 1.3:1 |

CI 95, 95% confidence intervals; POR, posterior odds ratio; FC, fold change; OR, odd ratio.

|                  |    |      |            |       |
|------------------|----|------|------------|-------|
| hsa-miR-221-5p   | OR | 1.12 | 0.22–4.97  | 1.3:1 |
| hsa-miR-320b     | FC | 1.08 | 0.35–2.99  | 1.2:1 |
| hsa-let-7i-5p    | FC | 1.11 | 0.28–4.39  | 1.2:1 |
| hsa-miR-138-2-3p | OR | 1.16 | 0.11–11.99 | 1.2:1 |
| hsa-miR-449b-5p  | FC | 1.1  | 0.24–4.84  | 1.2:1 |
| hsa-miR-106a-5p  | FC | 0.92 | 0.25–3.14  | 1.2:1 |
| hsa-miR-297      | FC | 0.94 | 0.35–2.94  | 1.2:1 |
| hsa-miR-152      | FC | 0.93 | 0.24–3.79  | 1.2:1 |
| hsa-miR-216b     | OR | 0.88 | 0.14–5.72  | 1.2:1 |
| hsa-miR-744-3p   | FC | 1.07 | 0.37–3.18  | 1.2:1 |
| hsa-miR-224-3p   | OR | 1.07 | 0.2–5.27   | 1.2:1 |
| hsa-miR-517c-3p  | OR | 0.88 | 0.15–5.37  | 1.2:1 |
| hsa-miR-101-3p   | FC | 1.1  | 0.22–6.32  | 1.2:1 |
| hsa-miR-576-3p   | OR | 1.09 | 0.1–10.1   | 1.2:1 |
| hsa-miR-520d-3p  | FC | 0.93 | 0.22–3.28  | 1.2:1 |
| hsa-miR-149-5p   | FC | 0.95 | 0.31–3.06  | 1.2:1 |
| hsa-miR-24-1-5p  | OR | 1.07 | 0.11–12.44 | 1.2:1 |
| hsa-miR-525-5p   | OR | 1.07 | 0.09–9.47  | 1.2:1 |
| hsa-miR-1911-3p  | OR | 1.05 | 0.17–7.36  | 1.2:1 |
| hsa-miR-609      | OR | 1.08 | 0.1–11.03  | 1.2:1 |
| hsa-miR-508-5p   | OR | 1.07 | 0.11–10.76 | 1.2:1 |
| hsa-miR-877-3p   | FC | 0.95 | 0.31–2.84  | 1.2:1 |
| hsa-miR-28-3p    | FC | 1.05 | 0.33–3.15  | 1.2:1 |
| hsa-miR-16-2-3p  | OR | 1.07 | 0.1–11.41  | 1.1:1 |
| hsa-miR-383      | OR | 1.06 | 0.11–11.51 | 1.1:1 |
| hsa-miR-125a-3p  | OR | 1.05 | 0.1–11.22  | 1.1:1 |
| hsa-miR-493-5p   | OR | 1.08 | 0.11–10.76 | 1.1:1 |
| hsa-miR-129-5p   | OR | 1.06 | 0.11–9.93  | 1.1:1 |
| hsa-miR-646      | OR | 0.93 | 0.17–6.28  | 1.1:1 |
| hsa-miR-1258     | OR | 1.07 | 0.11–11.42 | 1.1:1 |
| hsa-miR-875-3p   | OR | 1.04 | 0.1–11.07  | 1.1:1 |
| hsa-miR-423-3p   | FC | 0.94 | 0.26–3.34  | 1.1:1 |
| hsa-miR-671-3p   | OR | 1.08 | 0.11–11.6  | 1.1:1 |
| hsa-miR-629-3p   | FC | 1.03 | 0.29–3.62  | 1.1:1 |
| hsa-miR-513c-5p  | OR | 1.05 | 0.1–10.75  | 1.1:1 |
| hsa-miR-501-5p   | FC | 1.06 | 0.26–4.18  | 1.1:1 |
| hsa-miR-922      | OR | 1.06 | 0.11–10.83 | 1.1:1 |
| hsa-miR-181a-3p  | OR | 1.04 | 0.1–10.74  | 1.1:1 |
| hsa-miR-499a-5p  | OR | 1.04 | 0.11–10.83 | 1.1:1 |
| hsa-miR-92a-2-5p | OR | 1.04 | 0.09–9.56  | 1.1:1 |
| hsa-miR-30c-5p   | FC | 0.97 | 0.32–3.19  | 1.1:1 |
| hsa-miR-18a-3p   | OR | 1.06 | 0.11–11.15 | 1.1:1 |
| hsa-miR-532-5p   | FC | 0.96 | 0.22–3.6   | 1.1:1 |
| hsa-miR-196b-5p  | OR | 0.96 | 0.22–4.84  | 1.1:1 |
| hsa-miR-517a-3p  | OR | 0.92 | 0.11–9.51  | 1.1:1 |
| hsa-miR-193b-3p  | FC | 1.04 | 0.26–4.18  | 1.1:1 |
| hsa-miR-30a-3p   | FC | 1.03 | 0.35–3.12  | 1.1:1 |
| hsa-miR-668      | OR | 1.04 | 0.1–10.02  | 1.1:1 |
| hsa-miR-525-3p   | OR | 0.92 | 0.1–9.52   | 1.1:1 |
| hsa-miR-338-5p   | OR | 1.02 | 0.11–11.16 | 1.1:1 |

CI 95, 95% confidence intervals; POR, posterior odds ratio; FC, fold change; OR, odd ratio.

|                  |    |      |            |       |
|------------------|----|------|------------|-------|
| hsa-miR-144-5p   | OR | 0.92 | 0.1–9.01   | 1.1:1 |
| hsa-miR-15a-5p   | FC | 1.05 | 0.26–4.14  | 1.1:1 |
| hsa-miR-514a-3p  | OR | 0.94 | 0.16–6.05  | 1.1:1 |
| hsa-miR-550a-3p  | OR | 0.95 | 0.16–5.83  | 1.1:1 |
| hsa-miR-103a-3p  | FC | 0.97 | 0.35–2.43  | 1.1:1 |
| hsa-miR-301a-3p  | OR | 0.96 | 0.15–5.35  | 1.1:1 |
| hsa-miR-92a-1-5p | OR | 1.03 | 0.11–11.13 | 1.1:1 |
| hsa-miR-19a-3p   | FC | 1.03 | 0.24–4.83  | 1:01  |
| hsa-miR-623      | OR | 0.95 | 0.15–5.74  | 1:01  |
| hsa-miR-580      | OR | 0.92 | 0.1–9.84   | 1:01  |
| hsa-miR-596      | OR | 1    | 0.14–5.61  | 1:01  |
| hsa-miR-134      | FC | 1.02 | 0.34–2.95  | 1:01  |
| hsa-miR-595      | FC | 1.01 | 0.32–2.84  | 1:01  |
| hsa-miR-652-3p   | OR | 0.97 | 0.18–5.34  | 1:01  |
| hsa-miR-625-3p   | OR | 0.94 | 0.1–9.3    | 1:01  |
| hsa-miR-487a     | OR | 0.94 | 0.1–9.86   | 1:01  |
| hsa-let-7f-1-3p  | OR | 0.95 | 0.1–9.15   | 1:01  |
| hsa-miR-181a-5p  | FC | 0.99 | 0.26–3.54  | 1:01  |
| hsa-miR-298      | OR | 0.94 | 0.08–8.49  | 1:01  |
| hsa-miR-24-3p    | FC | 0.99 | 0.33–3.08  | 1:01  |
| hsa-miR-512-5p   | OR | 0.95 | 0.1–9.48   | 1:01  |
| hsa-miR-372      | OR | 0.96 | 0.09–8.99  | 1:01  |
| hsa-miR-147b     | OR | 0.96 | 0.11–10.56 | 1:01  |
| hsa-let-7b-5p    | FC | 0.99 | 0.32–2.9   | 1:01  |
| hsa-miR-181b-5p  | OR | 0.99 | 0.22–4.24  | 1:01  |
